# Supplementary material for: Theoretical study on Au(i)-catalyzed [2 + 2 + 2] cycloadditions of ynamides with two discrete nitriles
Source: Royal Society of Chemistry journal article supplement (doi:10.1039/c5ob02568k), 2016-01-01
Supplement: c5ob02568k1.pdf [file c5ob02568k1.pdf]

## Supporting Information

### **Theoretical Study on Au(I)-Catalyzed [2+2+2] Cycloadditions of Ynamides with Two Discrete Nitriles**

Haosheng Liang,<sup>a</sup> Siwei Bi,<sup>\*a</sup> Yuxia Liu,<sup>a</sup> Ya-nan Tang,<sup>a</sup> Congcong Liu<sup>a</sup>

---

<sup>a</sup> College of Chemistry and Chemical Engineering, Qufu Normal University, Qufu 273165, P. R. China.

E-mail: siweibi@126.com; liuyuxia2008@163.com; Fax: +86-537-4456305; Tel: +86-537-4458308

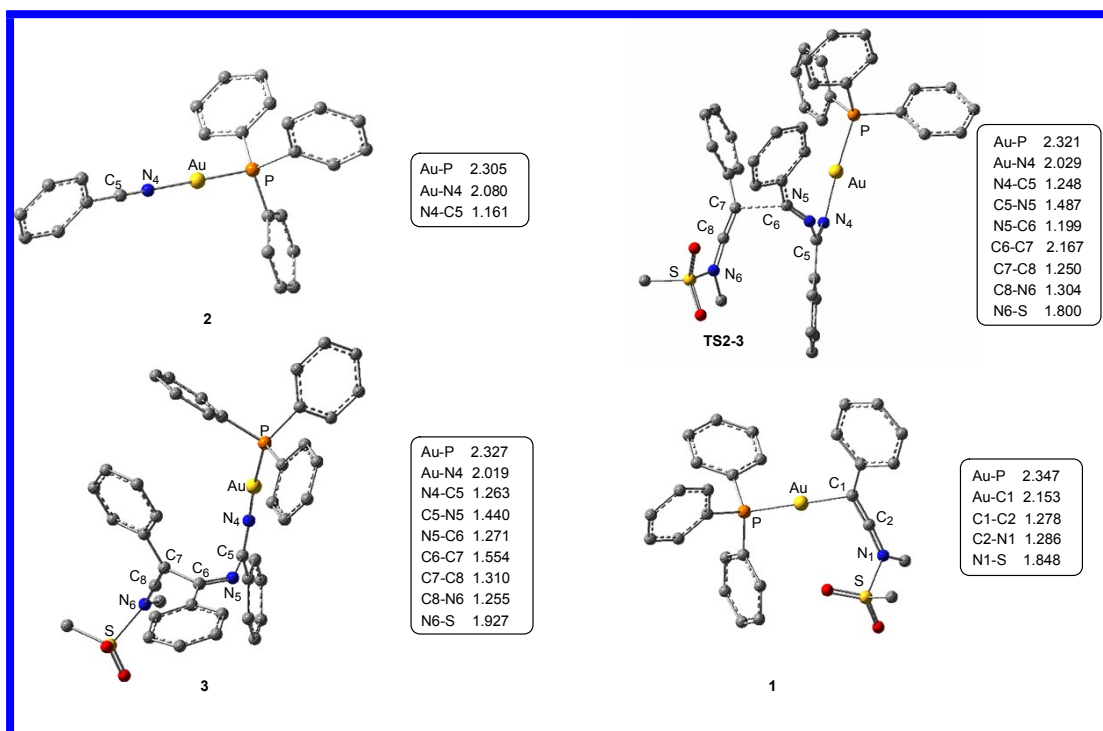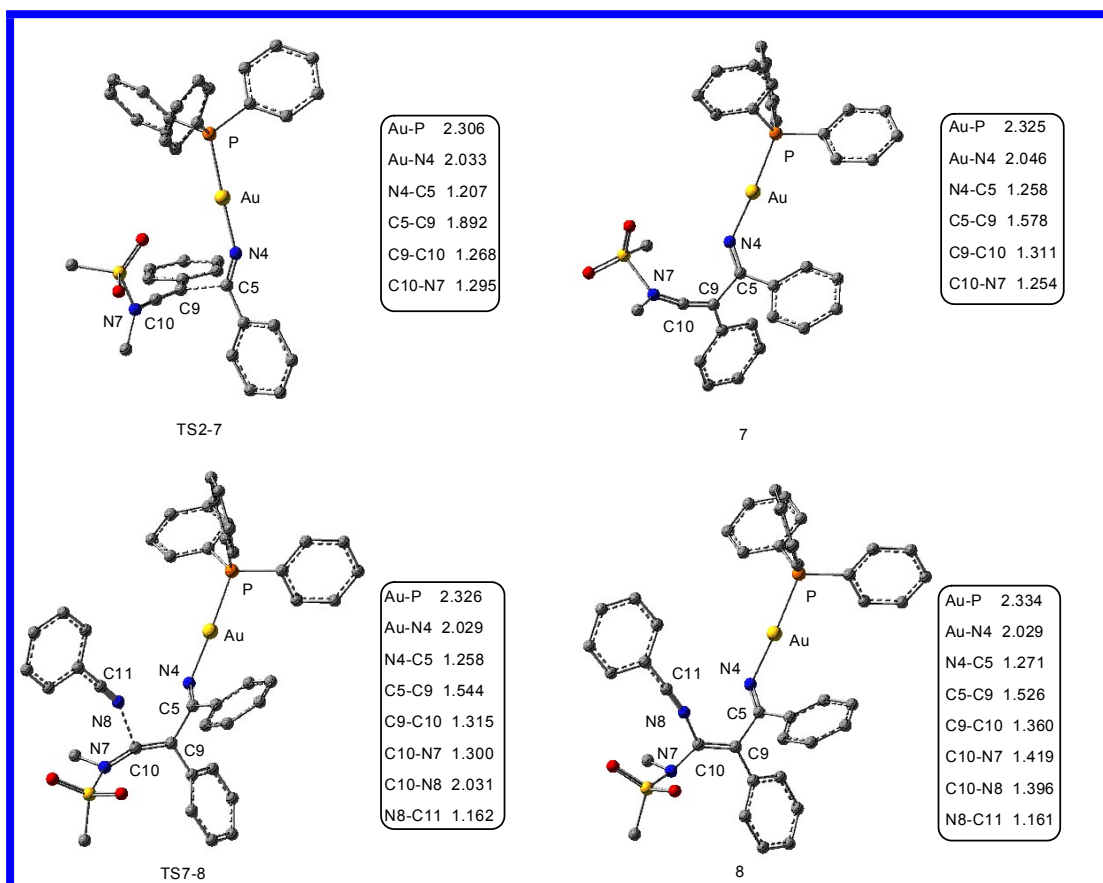

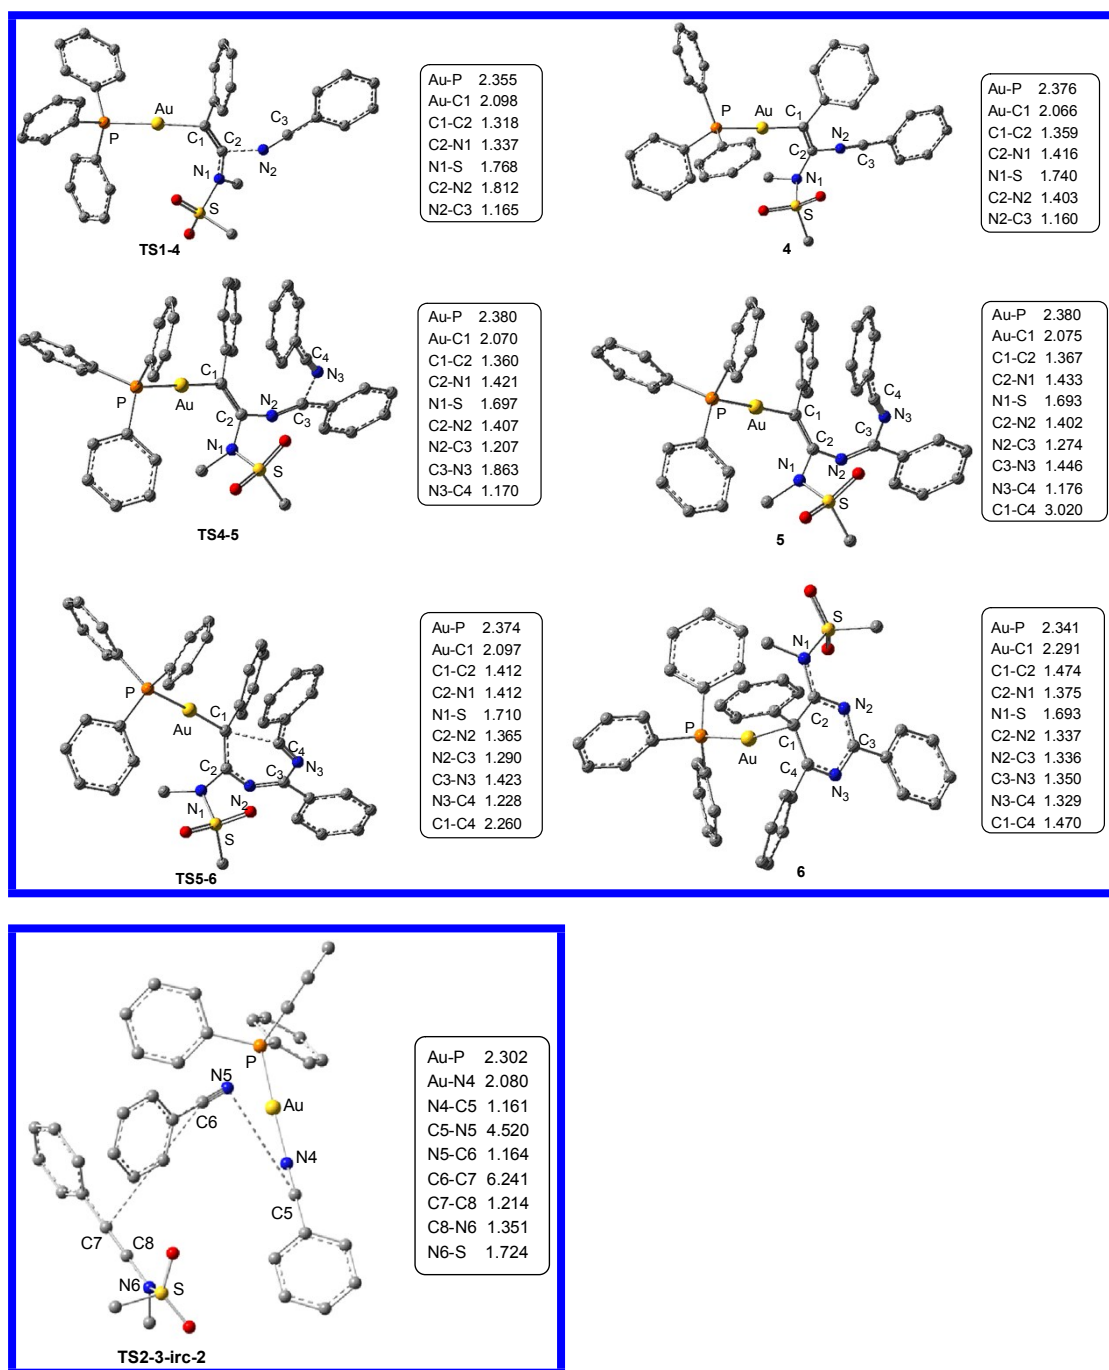

**Fig. S1.** Structures involved in path a \ path b and path c and TS2-3-irc-2. The bond distances are given in Å.

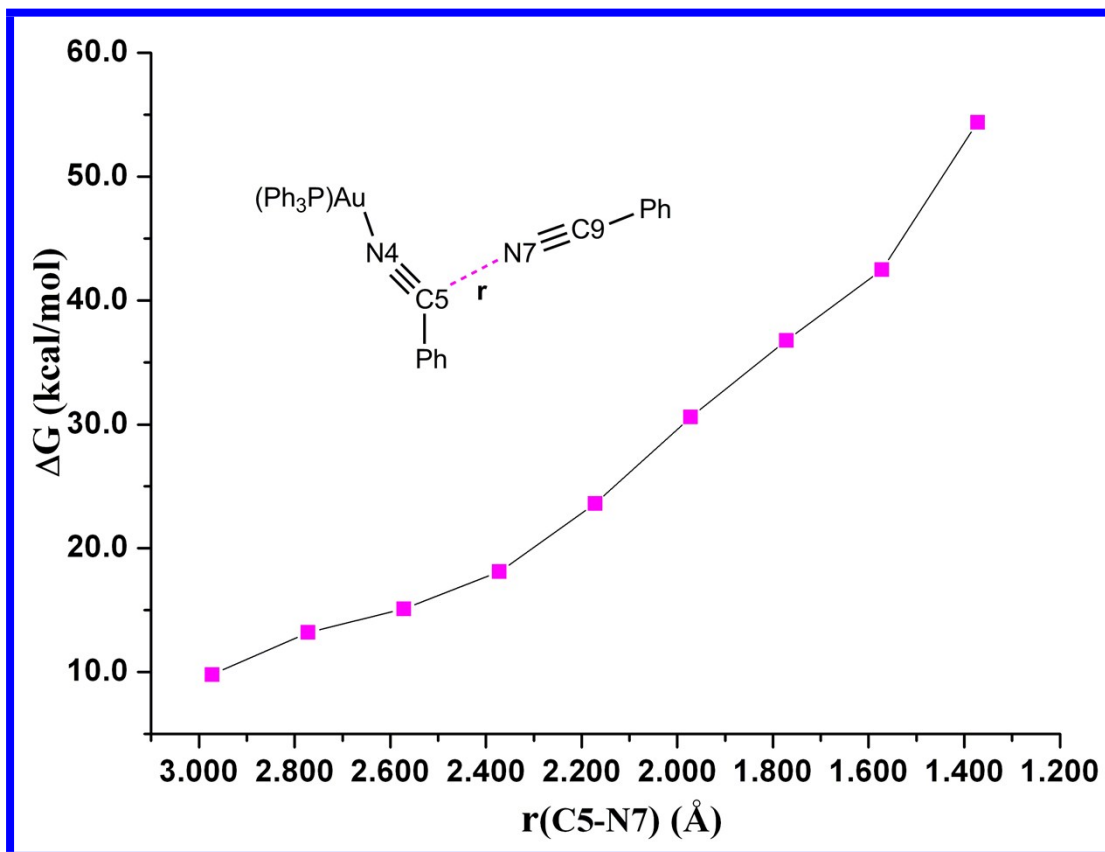

Fig. S2. Gibbs free energy changes with the second nitrile approaching to the C5 atom of the Au-nitrile species. The C5...N7 shortening goes with a decrement of 0.2 Å.

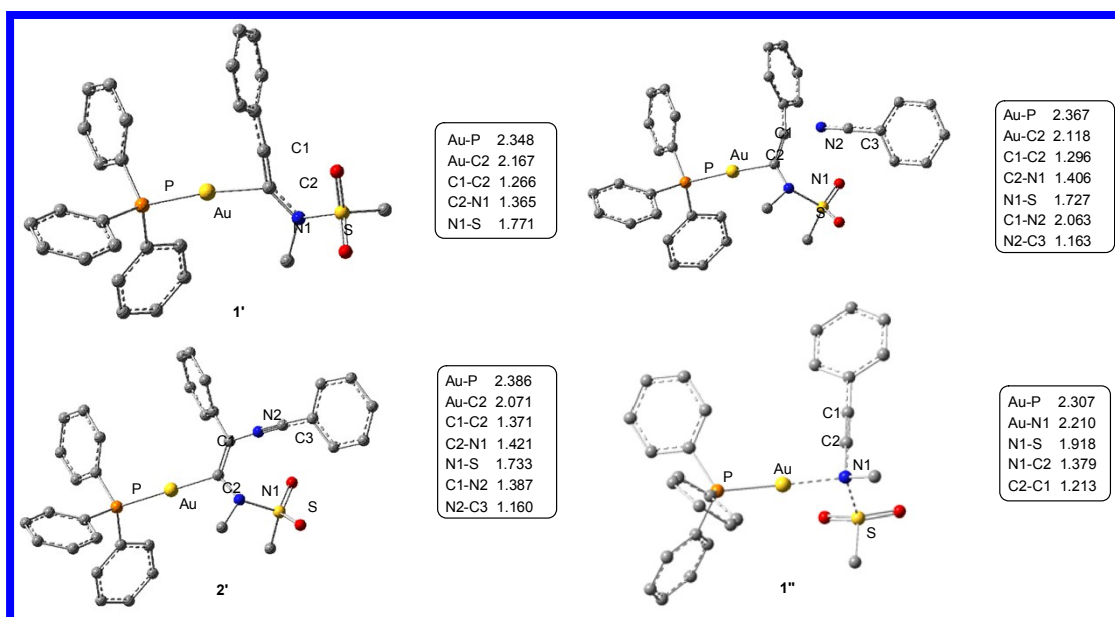

Fig. S3. Structures of intermediates  $1'$ ,  $\text{TS}1'-2'$ ,  $2'$  shown in Fig. 2 and  $1''$ . The bond distances are given in Å.

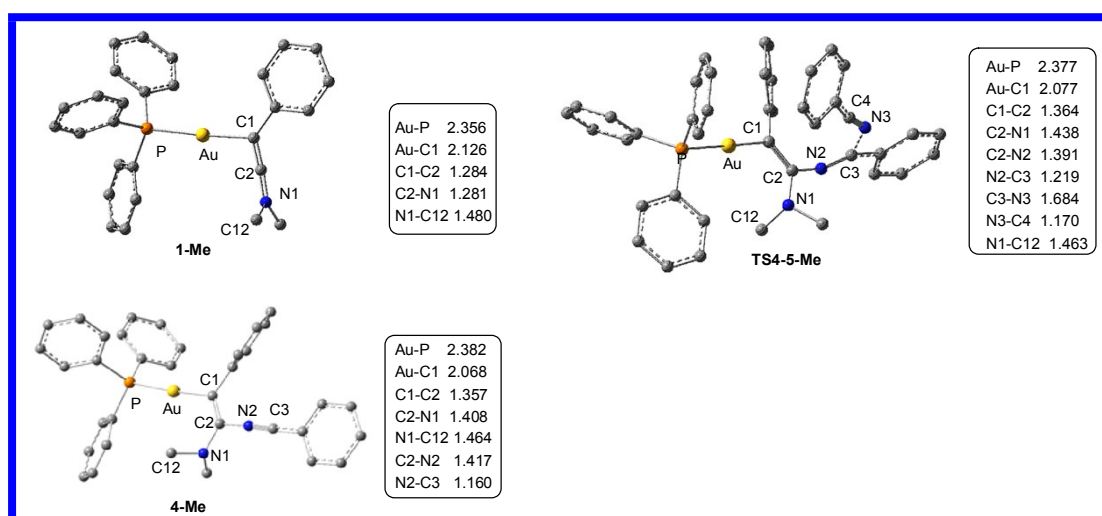

**Fig. S4.** Structures involved in Fig. 3 (b) where Me is attached on N1 atom. The bond distances are given in Å.

## Cartesian coordinates and electronic energies for all of the calculated structures

|    | 2           |             |             |
|----|-------------|-------------|-------------|
| C  | 3.90622500  | -0.00967200 | 0.00328800  |
| N  | 2.74510400  | -0.01418400 | 0.00323200  |
| Au | 0.66543200  | -0.01136100 | 0.00224700  |
| P  | -1.63992500 | 0.00189500  | -0.00010600 |
| C  | -2.30930700 | -0.04926500 | 1.70682600  |
| C  | -3.41571400 | 0.72869300  | 2.07729100  |
| C  | -1.71300100 | -0.90752800 | 2.64537400  |
| C  | -3.91871300 | 0.64493000  | 3.37692100  |
| H  | -3.87952100 | 1.39970400  | 1.36194000  |
| C  | -2.22414700 | -0.98871600 | 3.93917300  |
| H  | -0.85343000 | -1.51140700 | 2.36648800  |
| C  | -3.32590800 | -0.21121800 | 4.30618400  |
| H  | -4.77270800 | 1.25167200  | 3.66140700  |
| H  | -1.75985100 | -1.65312000 | 4.66119800  |
| H  | -3.71858400 | -0.27073700 | 5.31654900  |
| C  | -2.29591200 | 1.51187100  | -0.80835000 |
| C  | -3.42675600 | 1.45756400  | -1.63620000 |
| C  | -1.66632000 | 2.74348800  | -0.56526300 |
| C  | -3.92040400 | 2.62866200  | -2.21380700 |
| H  | -3.91611700 | 0.50983900  | -1.83529000 |
| C  | -2.16773800 | 3.90855100  | -1.14263800 |
| H  | -0.78876500 | 2.79238700  | 0.07398700  |
| C  | -3.29338700 | 3.85138000  | -1.96879900 |
| H  | -4.79339400 | 2.58258200  | -2.85733100 |
| H  | -1.67772200 | 4.85834100  | -0.95260300 |
| H  | -3.67850900 | 4.75898300  | -2.42324500 |
| C  | -2.31205400 | -1.44652300 | -0.90251400 |
| C  | -3.43677500 | -2.13846000 | -0.43017300 |
| C  | -1.69903100 | -1.84518700 | -2.10172100 |
| C  | -3.94104900 | -3.21961600 | -1.15534200 |
| H  | -3.91325900 | -1.84311900 | 0.49876500  |
| C  | -2.21142000 | -2.92259100 | -2.82186800 |
| H  | -0.82524200 | -1.31552900 | -2.47209600 |
| C  | -3.33119500 | -3.61154800 | -2.34803400 |
| H  | -4.80928400 | -3.75559400 | -0.78484100 |
| H  | -1.73424900 | -3.22738600 | -3.74801000 |
| H  | -3.72487300 | -4.45497100 | -2.90681900 |
| C  | 5.32906800  | -0.00378700 | 0.00301400  |
| C  | 6.02753100  | -1.22713700 | -0.01130600 |
| C  | 6.01717100  | 1.22544000  | 0.01640500  |
| C  | 7.41781700  | -1.21006200 | -0.01229700 |
| H  | 5.48262200  | -2.16498200 | -0.02142400 |
| C  | 7.40754000  | 1.22030600  | 0.01518800  |

|   |            |             |             |
|---|------------|-------------|-------------|
| H | 5.46416900 | 2.15852100  | 0.02729200  |
| C | 8.10470700 | 0.00803600  | 0.00085900  |
| H | 7.96674600 | -2.14569600 | -0.02325900 |
| H | 7.94842600 | 2.16061600  | 0.02536300  |
| H | 9.19019600 | 0.01263300  | 0.00007300  |

TS2-3-irc-2

|    |             |             |             |
|----|-------------|-------------|-------------|
| C  | 1.22982000  | -3.08270000 | -0.57571200 |
| N  | 0.23212600  | -2.50714400 | -0.43217000 |
| C  | 4.40300900  | 1.27386200  | 2.18815300  |
| C  | 3.64465800  | 2.20392800  | 2.37312800  |
| C  | 0.16598500  | 1.21099800  | -2.71240800 |
| N  | -0.73935800 | 0.52894400  | -2.44927000 |
| N  | 5.24355900  | 0.23057600  | 2.01320400  |
| C  | 5.97140300  | -0.32156700 | 3.17368300  |
| H  | 6.53083300  | -1.19603500 | 2.84393400  |
| H  | 6.64914800  | 0.41767500  | 3.61424700  |
| H  | 5.23475900  | -0.62533700 | 3.91991400  |
| Au | -1.57575600 | -1.51598300 | -0.15860200 |
| P  | -3.61465700 | -0.50169000 | 0.17833200  |
| S  | 5.89733000  | 0.02551800  | 0.43114600  |
| O  | 6.65970200  | -1.23594500 | 0.46332000  |
| O  | 4.77974800  | 0.22556000  | -0.51278700 |
| C  | 7.05128300  | 1.40236100  | 0.22543200  |
| H  | 7.86606500  | 1.28284600  | 0.94064700  |
| H  | 7.43167300  | 1.35016600  | -0.79634400 |
| H  | 6.50805300  | 2.33357800  | 0.39149500  |
| C  | -4.71515300 | -0.74858200 | -1.27113700 |
| C  | -6.05944000 | -1.11623900 | -1.11909600 |
| C  | -4.18051300 | -0.54950000 | -2.55568900 |
| C  | -6.86449100 | -1.28326000 | -2.24763200 |
| H  | -6.47677000 | -1.27781200 | -0.13075200 |
| C  | -4.99467500 | -0.71657600 | -3.67496100 |
| H  | -3.13933100 | -0.26304500 | -2.67708000 |
| C  | -6.33422200 | -1.08490400 | -3.52313700 |
| H  | -7.90429700 | -1.57146600 | -2.12726000 |
| H  | -4.58049200 | -0.56344500 | -4.66685600 |
| H  | -6.96259700 | -1.21960400 | -4.39839200 |
| C  | -4.48986500 | -1.17325800 | 1.64816300  |
| C  | -5.28326700 | -0.35008300 | 2.46074900  |
| C  | -4.38292100 | -2.54231800 | 1.94049900  |
| C  | -5.96156800 | -0.89488400 | 3.55235000  |
| H  | -5.36687800 | 0.71095600  | 2.24998000  |
| C  | -5.06734500 | -3.08072000 | 3.02908500  |
| H  | -3.76397700 | -3.18494000 | 1.32036700  |
| C  | -5.85549300 | -2.25728600 | 3.83681900  |
| H  | -6.57031500 | -0.25223700 | 4.18092700  |
| H  | -4.97981400 | -4.14004200 | 3.24994400  |

|   |             |             |             |
|---|-------------|-------------|-------------|
| H | -6.38235400 | -2.67662500 | 4.68853500  |
| C | -3.45536000 | 1.30947400  | 0.43077500  |
| C | -4.42562000 | 2.19371700  | -0.06328300 |
| C | -2.36301100 | 1.80834100  | 1.15711800  |
| C | -4.30392900 | 3.56334400  | 0.17610600  |
| H | -5.26654900 | 1.81826100  | -0.63730500 |
| C | -2.24714700 | 3.17750700  | 1.39349300  |
| H | -1.60226300 | 1.12984400  | 1.53328400  |
| C | -3.21810700 | 4.05445300  | 0.90303300  |
| H | -5.05621800 | 4.24468200  | -0.20947600 |
| H | -1.39570500 | 3.55914600  | 1.94846500  |
| H | -3.12570300 | 5.12126400  | 1.08374600  |
| C | 1.28001200  | 2.05073300  | -3.04072200 |
| C | 2.52764300  | 1.82692100  | -2.43218100 |
| C | 1.11960900  | 3.08953900  | -3.97487400 |
| C | 3.60546500  | 2.64404900  | -2.76359200 |
| H | 2.65736100  | 1.02470300  | -1.71445200 |
| C | 2.20667600  | 3.89857400  | -4.29435700 |
| H | 0.15298600  | 3.25140400  | -4.44002100 |
| C | 3.44783000  | 3.67730000  | -3.69090600 |
| H | 4.56671500  | 2.45800300  | -2.29692400 |
| H | 2.08643100  | 4.70030500  | -5.01597600 |
| H | 4.29233800  | 4.30993300  | -3.94723200 |
| C | 2.45246400  | -3.79316500 | -0.73876300 |
| C | 3.67421000  | -3.09873700 | -0.65247600 |
| C | 2.41944900  | -5.18298200 | -0.96798100 |
| C | 4.86389900  | -3.80778200 | -0.78829500 |
| H | 3.69074900  | -2.02642700 | -0.48768200 |
| C | 3.61891400  | -5.87137700 | -1.10872600 |
| H | 1.46876100  | -5.70153100 | -1.03222600 |
| C | 4.83550700  | -5.18670300 | -1.01628200 |
| H | 5.80464800  | -3.27480100 | -0.70300000 |
| H | 3.60650500  | -6.94151100 | -1.28747100 |
| H | 5.76760500  | -5.73341200 | -1.12211500 |
| C | 2.75024500  | 3.29847500  | 2.56719600  |
| C | 2.15953100  | 3.94029600  | 1.46035300  |
| C | 2.44980100  | 3.75774600  | 3.86503500  |
| C | 1.29802900  | 5.01802600  | 1.65348600  |
| H | 2.38672900  | 3.59117800  | 0.45796200  |
| C | 1.58128300  | 4.83089900  | 4.04621100  |
| H | 2.90298900  | 3.26875300  | 4.72130700  |
| C | 1.00428000  | 5.46759700  | 2.94413600  |
| H | 0.85876100  | 5.51193800  | 0.79154100  |
| H | 1.36007800  | 5.17645900  | 5.05163300  |
| H | 0.33842100  | 6.31282300  | 3.09021900  |

**TS2-3**

|   |            |             |             |
|---|------------|-------------|-------------|
| C | 1.56913000 | -1.97531300 | -0.54699500 |
|---|------------|-------------|-------------|



|    |             |             |             |
|----|-------------|-------------|-------------|
| N  | 0.48554200  | -2.14515900 | 0.04788700  |
| C  | 3.96517800  | 0.37318400  | 0.99083100  |
| C  | 2.82942700  | 0.87542900  | 0.84498400  |
| C  | 2.15916200  | 0.41076200  | -1.16215500 |
| N  | 1.83497000  | -0.73276700 | -1.31940900 |
| N  | 5.12990100  | -0.21242200 | 1.03307000  |
| C  | 5.33370300  | -1.60716300 | 1.49668300  |
| H  | 5.99684800  | -2.12391000 | 0.78883100  |
| H  | 5.76748800  | -1.60415600 | 2.50854200  |
| H  | 4.35557000  | -2.10701800 | 1.51090800  |
| Au | -1.28240700 | -1.15077800 | 0.02341700  |
| P  | -3.39523400 | -0.19025700 | 0.01507100  |
| S  | 6.57858600  | 0.71463200  | 0.50380500  |
| O  | 7.47213600  | -0.28072500 | -0.08705300 |
| O  | 6.04746500  | 1.87672800  | -0.22318600 |
| C  | 7.25584000  | 1.27303400  | 2.08018300  |
| H  | 7.51003500  | 0.40354900  | 2.68303800  |
| H  | 8.15697000  | 1.84023200  | 1.83963300  |
| H  | 6.52105400  | 1.91036600  | 2.57186100  |
| C  | -4.62193100 | -1.22236800 | -0.88771400 |
| C  | -5.96093200 | -1.30415700 | -0.48307900 |
| C  | -4.19631600 | -1.93427600 | -2.02088500 |
| C  | -6.86504000 | -2.08444300 | -1.20800700 |
| H  | -6.29982500 | -0.76829400 | 0.39766100  |
| C  | -5.10384200 | -2.70982800 | -2.74358400 |
| H  | -3.15646800 | -1.88861300 | -2.33488700 |
| C  | -6.43802400 | -2.78559600 | -2.33721100 |
| H  | -7.89828400 | -2.14656500 | -0.88472300 |
| H  | -4.76694400 | -3.25944700 | -3.61714400 |
| H  | -7.14181400 | -3.39482500 | -2.89416500 |
| C  | -4.06769100 | 0.05215300  | 1.71235500  |
| C  | -4.87602300 | 1.15106100  | 2.03917400  |
| C  | -3.78038500 | -0.91032000 | 2.69322900  |
| C  | -5.39197400 | 1.28105600  | 3.33086900  |
| H  | -5.10029500 | 1.90611600  | 1.29250900  |
| C  | -4.29937600 | -0.77655700 | 3.98089500  |
| H  | -3.15202400 | -1.76278700 | 2.44928100  |
| C  | -5.10427200 | 0.31966200  | 4.30124900  |
| H  | -6.01647900 | 2.13452600  | 3.57708700  |
| H  | -4.07339700 | -1.52619400 | 4.73314000  |
| H  | -5.50465200 | 0.42437000  | 5.30511200  |
| C  | -3.43120400 | 1.47227800  | -0.78421400 |
| C  | -4.42949500 | 1.83085900  | -1.69942100 |
| C  | -2.43081100 | 2.39859100  | -0.44910000 |
| C  | -4.42730700 | 3.10504900  | -2.27141100 |
| H  | -5.20653300 | 1.12143500  | -1.96582800 |
| C  | -2.43725400 | 3.67163900  | -1.01953600 |
| H  | -1.64934900 | 2.13029000  | 0.25559100  |

|   |             |             |             |
|---|-------------|-------------|-------------|
| C | -3.43592900 | 4.02700200  | -1.93291100 |
| H | -5.20369600 | 3.37535500  | -2.98179300 |
| H | -1.66971800 | 4.38757300  | -0.74352000 |
| H | -3.44137100 | 5.01787100  | -2.37490500 |
| C | 2.11893300  | 1.69936600  | -1.81961300 |
| C | 3.24383300  | 2.53624800  | -1.90595900 |
| C | 0.89796200  | 2.07078400  | -2.41908400 |
| C | 3.14800300  | 3.73017100  | -2.61771400 |
| H | 4.17714100  | 2.25254600  | -1.43568700 |
| C | 0.81411400  | 3.27819500  | -3.10722500 |
| H | 0.02959300  | 1.42596100  | -2.32461200 |
| C | 1.93809200  | 4.10206300  | -3.21534000 |
| H | 4.01885900  | 4.37162700  | -2.70324400 |
| H | -0.14042700 | 3.57664400  | -3.53723100 |
| H | 1.87037800  | 5.03862300  | -3.75995700 |
| C | 2.70055500  | -2.93768700 | -0.63093400 |
| C | 3.77618000  | -2.76550300 | -1.51597600 |
| C | 2.66463000  | -4.07370900 | 0.19630100  |
| C | 4.79931900  | -3.71135100 | -1.56943900 |
| H | 3.80593100  | -1.90595400 | -2.17746400 |
| C | 3.69488600  | -5.00893300 | 0.14627400  |
| H | 1.81574700  | -4.20129400 | 0.86015600  |
| C | 4.76426100  | -4.83102200 | -0.73651900 |
| H | 5.62164600  | -3.57668200 | -2.26847400 |
| H | 3.65834600  | -5.88353400 | 0.78642100  |
| H | 5.56242800  | -5.56855800 | -0.78235000 |
| C | 1.78053100  | 1.63030600  | 1.52135800  |
| C | 1.72868900  | 3.03018600  | 1.42179500  |
| C | 0.81158600  | 0.95059100  | 2.28218000  |
| C | 0.72940500  | 3.73808700  | 2.09010400  |
| H | 2.47224900  | 3.55492100  | 0.83134500  |
| C | -0.18324800 | 1.66916900  | 2.94440900  |
| H | 0.84340000  | -0.13157200 | 2.34866300  |
| C | -0.22745700 | 3.06304400  | 2.85319600  |
| H | 0.70560600  | 4.82155900  | 2.02057000  |
| H | -0.92487500 | 1.13621200  | 3.53153000  |
| H | -0.99900300 | 3.61878200  | 3.37402600  |

### 3

|   |            |             |             |
|---|------------|-------------|-------------|
| C | 1.50030700 | 1.81779800  | 0.56417900  |
| N | 0.44182100 | 2.02578400  | -0.09179200 |
| C | 3.83527400 | -0.08189800 | -0.73282800 |
| C | 2.69012300 | -0.64781300 | -0.44157400 |
| C | 2.19514400 | -0.44242900 | 1.01761600  |
| N | 1.69371700 | 0.66078600  | 1.40016500  |
| N | 4.98035600 | 0.37408300  | -0.97184800 |
| C | 5.32094000 | 1.76802200  | -1.35818000 |
| H | 6.03566300 | 2.15691700  | -0.63355400 |
| H | 5.75887700 | 1.76018400  | -2.35893300 |

|    |             |             |             |
|----|-------------|-------------|-------------|
| H  | 4.41098600  | 2.36614800  | -1.34145700 |
| Au | -1.31492500 | 1.03127100  | -0.04922400 |
| P  | -3.45669700 | 0.12081300  | -0.03329300 |
| S  | 6.48868700  | -0.77497100 | -0.62650900 |
| O  | 7.47139500  | 0.11771500  | -0.00971600 |
| O  | 5.88619000  | -1.94113000 | 0.01993400  |
| C  | 6.98672900  | -1.18864300 | -2.31208600 |
| H  | 7.25448900  | -0.27278800 | -2.83929000 |
| H  | 7.86250200  | -1.83492400 | -2.21058300 |
| H  | 6.16793500  | -1.72454300 | -2.79237600 |
| C  | -4.77141200 | 1.37553600  | -0.33486400 |
| C  | -5.93105800 | 1.08045200  | -1.06726600 |
| C  | -4.60726000 | 2.65727600  | 0.21442100  |
| C  | -6.91396300 | 2.05622700  | -1.24260100 |
| H  | -6.06482700 | 0.09731800  | -1.50697600 |
| C  | -5.59486600 | 3.62594000  | 0.03985300  |
| H  | -3.70730700 | 2.89757700  | 0.77384300  |
| C  | -6.74817100 | 3.32702000  | -0.68927000 |
| H  | -7.80731200 | 1.82250200  | -1.81390500 |
| H  | -5.45967900 | 4.61501600  | 0.46673700  |
| H  | -7.51324900 | 4.08456900  | -0.82999000 |
| C  | -3.69175800 | -1.15568700 | -1.34724500 |
| C  | -4.17658000 | -2.44156300 | -1.07244400 |
| C  | -3.35117100 | -0.81433500 | -2.66699100 |
| C  | -4.32322000 | -3.37130400 | -2.10619900 |
| H  | -4.44260000 | -2.71964000 | -0.05805800 |
| C  | -3.51273500 | -1.74020000 | -3.69638700 |
| H  | -2.96201600 | 0.17589500  | -2.88844400 |
| C  | -3.99720900 | -3.02180000 | -3.41744500 |
| H  | -4.70194000 | -4.36463900 | -1.88441900 |
| H  | -3.25990200 | -1.46164400 | -4.71514600 |
| H  | -4.12346800 | -3.74266300 | -4.21988300 |
| C  | -3.89607700 | -0.69732700 | 1.55780200  |
| C  | -5.22887400 | -0.80350500 | 1.98476600  |
| C  | -2.87263000 | -1.23744700 | 2.35148200  |
| C  | -5.52979600 | -1.44719400 | 3.18548200  |
| H  | -6.02849900 | -0.37594400 | 1.38834900  |
| C  | -3.17945300 | -1.88432700 | 3.54886000  |
| H  | -1.83733700 | -1.13992300 | 2.03779500  |
| C  | -4.50723400 | -1.98910700 | 3.96736000  |
| H  | -6.56272600 | -1.52034200 | 3.51197000  |
| H  | -2.38075300 | -2.29769200 | 4.15736200  |
| H  | -4.74485600 | -2.48548300 | 4.90344500  |
| C  | 2.29174000  | -1.61324600 | 1.92355400  |
| C  | 3.02828900  | -2.76000800 | 1.58726000  |
| C  | 1.63561200  | -1.55819500 | 3.16839000  |
| C  | 3.10732700  | -3.83078000 | 2.47765300  |
| H  | 3.55736800  | -2.81712800 | 0.64291000  |

|   |              |              |              |
|---|--------------|--------------|--------------|
| C | 1. 71666700  | -2. 63047300 | 4. 04982700  |
| H | 1. 07655700  | -0. 66497500 | 3. 42480700  |
| C | 2. 45185400  | -3. 77074500 | 3. 70755200  |
| H | 3. 68572000  | -4. 70951600 | 2. 21008200  |
| H | 1. 21080400  | -2. 57751100 | 5. 00922800  |
| H | 2. 51526200  | -4. 60528500 | 4. 39925100  |
| C | 2. 61244000  | 2. 82188800  | 0. 64350700  |
| C | 3. 66235600  | 2. 70536200  | 1. 56855400  |
| C | 2. 57635400  | 3. 93952800  | -0. 20875500 |
| C | 4. 65812800  | 3. 68429400  | 1. 63679000  |
| H | 3. 68415600  | 1. 86758700  | 2. 25811500  |
| C | 3. 57805400  | 4. 90574500  | -0. 14818200 |
| H | 1. 74172100  | 4. 02867500  | -0. 89650500 |
| C | 4. 62306500  | 4. 78245100  | 0. 77579900  |
| H | 5. 45302000  | 3. 59292800  | 2. 37152300  |
| H | 3. 53799100  | 5. 76604100  | -0. 81026000 |
| H | 5. 39394200  | 5. 54537400  | 0. 83250500  |
| C | 1. 87477500  | -1. 39701600 | -1. 41710700 |
| C | 0. 64450800  | -1. 95409400 | -1. 02963700 |
| C | 2. 31780900  | -1. 56595900 | -2. 74354000 |
| C | -0. 11949900 | -2. 67008500 | -1. 95007500 |
| H | 0. 28667700  | -1. 82919400 | -0. 01522800 |
| C | 1. 55338800  | -2. 28094500 | -3. 65590900 |
| H | 3. 25921800  | -1. 12627500 | -3. 06329600 |
| C | 0. 33164900  | -2. 83681500 | -3. 25926800 |
| H | -1. 07244500 | -3. 08891500 | -1. 64498100 |
| H | 1. 90372300  | -2. 40398800 | -4. 67583600 |
| H | -0. 26886300 | -3. 39263000 | -3. 97221600 |

**TS2-7**

|    |              |              |              |
|----|--------------|--------------|--------------|
| C  | 4. 20061500  | -0. 27173900 | 0. 51881000  |
| N  | 3. 07133000  | -0. 10013200 | 0. 90741200  |
| Au | 1. 06763500  | -0. 18971800 | 0. 57840700  |
| P  | -1. 21926200 | -0. 30462700 | 0. 30513200  |
| C  | -2. 08841800 | 1. 13475200  | 1. 05061100  |
| C  | -3. 23652700 | 1. 68616900  | 0. 46284900  |
| C  | -1. 59514600 | 1. 67346700  | 2. 24965500  |
| C  | -3. 88301900 | 2. 76257700  | 1. 07294400  |
| H  | -3. 62144500 | 1. 28523700  | -0. 46919000 |
| C  | -2. 24809800 | 2. 74572900  | 2. 85571400  |
| H  | -0. 70116600 | 1. 25741700  | 2. 70611400  |
| C  | -3. 39132400 | 3. 29200400  | 2. 26732100  |
| H  | -4. 76882900 | 3. 18826600  | 0. 61150500  |
| H  | -1. 86054200 | 3. 15812500  | 3. 78218200  |
| H  | -3. 89497100 | 4. 13153400  | 2. 73677400  |

|   |             |             |             |
|---|-------------|-------------|-------------|
| C | -1.71930400 | -0.35108400 | -1.46537000 |
| C | -2.77810300 | -1.15586600 | -1.90954000 |
| C | -1.03660700 | 0.46500100  | -2.38141900 |
| C | -3.15030000 | -1.13908200 | -3.25535000 |
| H | -3.30778400 | -1.79638300 | -1.21190800 |
| C | -1.41625000 | 0.48086300  | -3.72275800 |
| H | -0.21078100 | 1.08631100  | -2.04572300 |
| C | -2.47262400 | -0.32180500 | -4.16129900 |
| H | -3.97028900 | -1.76537300 | -3.59346500 |
| H | -0.88604300 | 1.11709400  | -4.42492900 |
| H | -2.76534000 | -0.31080900 | -5.20691500 |
| C | -1.91875600 | -1.81303500 | 1.09093900  |
| C | -3.16440400 | -1.79171300 | 1.73545800  |
| C | -1.18731100 | -3.01072400 | 1.02656800  |
| C | -3.67400800 | -2.95949800 | 2.30580200  |
| H | -3.73096800 | -0.86859100 | 1.80102000  |
| C | -1.70562600 | -4.17301100 | 1.59658100  |
| H | -0.21675300 | -3.03587500 | 0.53854100  |
| C | -2.94703800 | -4.14907200 | 2.23680700  |
| H | -4.63646800 | -2.93625100 | 2.80766700  |
| H | -1.13480400 | -5.09547400 | 1.54942200  |
| H | -3.34378900 | -5.05430500 | 2.68637900  |
| C | 5.53044700  | -0.24893600 | 1.15630800  |
| C | 6.73535900  | -0.18820200 | 0.44066000  |
| C | 5.56109600  | -0.25805000 | 2.56377100  |
| C | 7.95152100  | -0.14298000 | 1.12207700  |
| H | 6.72528300  | -0.15491100 | -0.64258500 |
| C | 6.77866600  | -0.22316800 | 3.23567200  |
| H | 4.62478100  | -0.29801500 | 3.10960200  |
| C | 7.97672700  | -0.16570100 | 2.51756900  |
| H | 8.87919100  | -0.08412700 | 0.56129000  |
| H | 6.79372200  | -0.24047100 | 4.32100100  |
| H | 8.92543900  | -0.13538400 | 3.04455600  |
| C | 4.36913500  | -0.64625000 | -1.32841000 |
| C | 4.51086300  | -1.90052600 | -1.44360000 |
| C | 4.23593600  | 0.50453700  | -2.21751900 |
| C | 4.23462300  | 0.30826100  | -3.61408600 |
| C | 4.13603000  | 1.81490200  | -1.71698400 |

|   |            |             |             |
|---|------------|-------------|-------------|
| C | 4.13839900 | 1.39064300  | -4.48103200 |
| H | 4.31476300 | -0.69973500 | -4.01015300 |
| C | 4.03837700 | 2.89614700  | -2.59141300 |
| H | 4.13094100 | 1.98804700  | -0.64755900 |
| C | 4.03989500 | 2.68937400  | -3.97157300 |
| H | 4.14230700 | 1.22401100  | -5.55380600 |
| H | 3.96519200 | 3.90251100  | -2.19130300 |
| H | 3.96729600 | 3.53476400  | -4.64886500 |
| N | 4.64236100 | -3.18302800 | -1.32040900 |
| C | 5.95898200 | -3.86745800 | -1.30323100 |
| H | 6.66743500 | -3.24175800 | -0.75912600 |
| H | 5.84385600 | -4.81799200 | -0.78243600 |
| H | 6.31362800 | -4.03431900 | -2.32356000 |
| S | 3.15196300 | -4.19295700 | -1.03430000 |
| O | 2.10322700 | -3.23393500 | -0.66680000 |
| O | 3.58852100 | -5.29864700 | -0.17421600 |
| C | 2.83070700 | -4.81680100 | -2.69765600 |
| H | 2.62533800 | -3.96987500 | -3.35251900 |
| H | 3.69439500 | -5.39283300 | -3.03191300 |
| H | 1.95432500 | -5.46383800 | -2.61783700 |

7

|    |             |             |             |
|----|-------------|-------------|-------------|
| C  | 3.70626900  | -0.59916500 | -0.70627900 |
| N  | 2.60143500  | -1.00026800 | -1.15366800 |
| Au | 0.69864900  | -0.74009600 | -0.44766200 |
| P  | -1.49983000 | -0.56961500 | 0.29058200  |
| C  | -1.70374700 | 0.79781200  | 1.50709900  |
| C  | -2.79163200 | 1.68005100  | 1.45777200  |
| C  | -0.74144800 | 0.93872400  | 2.52079500  |
| C  | -2.91445100 | 2.69109600  | 2.41367900  |
| H  | -3.53846300 | 1.58401600  | 0.67671700  |
| C  | -0.87426600 | 1.94482000  | 3.47625800  |
| H  | 0.10845900  | 0.26272100  | 2.56279800  |
| C  | -1.95959800 | 2.82385200  | 3.42232500  |
| H  | -3.75781800 | 3.37331500  | 2.36775200  |
| H  | -0.13016200 | 2.04409900  | 4.26086600  |
| H  | -2.05867600 | 3.61053200  | 4.16413000  |
| C  | -2.69483100 | -0.24019200 | -1.06926200 |

|   |             |             |             |
|---|-------------|-------------|-------------|
| C | -3.98284000 | -0.79527700 | -1.06956300 |
| C | -2.30428300 | 0.60624000  | -2.11962600 |
| C | -4.86795200 | -0.50264700 | -2.10874500 |
| H | -4.29329500 | -1.45730900 | -0.26784000 |
| C | -3.19496000 | 0.89899600  | -3.15150300 |
| H | -1.30499600 | 1.03339000  | -2.13005100 |
| C | -4.47681700 | 0.34341800  | -3.14781500 |
| H | -5.86229600 | -0.93859500 | -2.10561700 |
| H | -2.88665200 | 1.55482800  | -3.95998800 |
| H | -5.16752600 | 0.56676000  | -3.95523700 |
| C | -2.07196100 | -2.09725600 | 1.14029400  |
| C | -2.95304200 | -2.04374400 | 2.23087600  |
| C | -1.63043600 | -3.34273800 | 0.66607400  |
| C | -3.38987500 | -3.22472300 | 2.83324900  |
| H | -3.29126300 | -1.08651000 | 2.61445000  |
| C | -2.07314900 | -4.51881500 | 1.27025200  |
| H | -0.93938000 | -3.39261600 | -0.17091300 |
| C | -2.95235300 | -4.46084600 | 2.35412000  |
| H | -4.06916000 | -3.17695600 | 3.67888100  |
| H | -1.72618300 | -5.47835200 | 0.89928700  |
| H | -3.29154100 | -5.37724000 | 2.82750000  |
| C | 4.05967700  | 0.25403800  | 0.46936100  |
| C | 5.28314400  | 0.08348600  | 1.13645000  |
| C | 3.17247500  | 1.24249600  | 0.92678200  |
| C | 5.59930700  | 0.85863200  | 2.25163600  |
| H | 5.98873300  | -0.66595500 | 0.79155300  |
| C | 3.49550500  | 2.02551200  | 2.03243700  |
| H | 2.23484600  | 1.40440100  | 0.40415600  |
| C | 4.70696600  | 1.83257600  | 2.70184400  |
| H | 6.54328800  | 0.70462100  | 2.76525100  |
| H | 2.80370900  | 2.79275500  | 2.36699200  |
| H | 4.95699200  | 2.44343600  | 3.56389100  |
| C | 4.94353400  | -1.05076300 | -1.57462300 |
| C | 5.17914700  | -2.33900200 | -1.50640400 |
| C | 5.68054400  | -0.09284700 | -2.41190700 |
| C | 6.88433500  | -0.46446800 | -3.04308700 |
| C | 5.17217200  | 1.20237000  | -2.61278500 |
| C | 7.55728000  | 0.43628800  | -3.85986500 |

|   |            |             |             |
|---|------------|-------------|-------------|
| H | 7.30009200 | -1.45447400 | -2.87483500 |
| C | 5.85121000 | 2.09964100  | -3.43404300 |
| H | 4.24662900 | 1.50213600  | -2.13451200 |
| C | 7.04142300 | 1.72143200  | -4.05814400 |
| H | 8.48690100 | 0.14192900  | -4.33646000 |
| H | 5.45034100 | 3.09686900  | -3.58476300 |
| H | 7.57010000 | 2.42583100  | -4.69268700 |
| N | 5.09573000 | -3.58990400 | -1.53975200 |
| C | 5.90576800 | -4.55175600 | -0.75437100 |
| H | 5.23448700 | -5.11420200 | -0.10208400 |
| H | 6.40307700 | -5.23212800 | -1.44792800 |
| H | 6.63532000 | -3.99791400 | -0.16491200 |
| S | 3.75810600 | -4.52287000 | -2.59728000 |
| O | 2.80405900 | -5.00242900 | -1.59340100 |
| O | 4.56763900 | -5.42330400 | -3.42367800 |
| C | 3.07500400 | -3.15719300 | -3.54641400 |
| H | 2.75321000 | -2.37505700 | -2.84220900 |
| H | 3.83296100 | -2.81677200 | -4.25255700 |
| H | 2.22523500 | -3.59670400 | -4.07543700 |

**TS7-8**

|    |             |             |             |
|----|-------------|-------------|-------------|
| C  | 4.61578000  | -0.39107300 | 1.47611000  |
| N  | 3.71445900  | -0.32282300 | 0.74570700  |
| C  | 2.86388400  | -0.11293600 | -1.08690600 |
| C  | 1.75362200  | 0.56663200  | -0.89837700 |
| C  | 1.11931500  | 0.86204100  | 0.47794500  |
| N  | 0.42716500  | -0.09554400 | 0.91068600  |
| N  | 3.68788200  | -0.75848900 | -1.85805400 |
| C  | 3.74370600  | -2.23833000 | -1.86199600 |
| H  | 2.72204300  | -2.60968000 | -1.77988800 |
| H  | 4.18298300  | -2.58645000 | -2.79779000 |
| H  | 4.34376600  | -2.59411200 | -1.02162900 |
| Au | -0.65958400 | -0.32410000 | 2.60831300  |
| P  | -1.91235200 | -0.72474400 | 4.52618900  |
| S  | 5.22032700  | 0.09876200  | -2.32821700 |
| O  | 5.01639300  | 1.49607600  | -1.92597300 |
| O  | 6.32055900  | -0.73243200 | -1.81177200 |
| C  | 5.14684600  | -0.02720300 | -4.12634900 |



|   |              |              |              |
|---|--------------|--------------|--------------|
| H | 4. 20399100  | 0. 40857700  | -4. 45823900 |
| H | 5. 99638700  | 0. 54687700  | -4. 50295700 |
| H | 5. 23825600  | -1. 07288800 | -4. 42006900 |
| C | 0. 99396400  | 0. 98718200  | -2. 11347900 |
| C | -0. 36377800 | 0. 65263000  | -2. 23152900 |
| C | 1. 61940500  | 1. 73911200  | -3. 12109600 |
| C | -1. 07876000 | 1. 05432800  | -3. 35839400 |
| H | -0. 83737700 | 0. 07332800  | -1. 44607800 |
| C | 0. 89033400  | 2. 14785100  | -4. 23798800 |
| H | 2. 65647200  | 2. 03745700  | -3. 00154100 |
| C | -0. 45641900 | 1. 80119400  | -4. 36212500 |
| H | -2. 12663100 | 0. 78558400  | -3. 45119900 |
| H | 1. 37159700  | 2. 74727600  | -5. 00505600 |
| H | -1. 02134500 | 2. 11850100  | -5. 23326200 |
| C | 1. 34862500  | 2. 25074200  | 0. 99007400  |
| C | 2. 50893200  | 2. 96283300  | 0. 64350500  |
| C | 0. 39702600  | 2. 87431000  | 1. 81331300  |
| C | 2. 72572700  | 4. 25022600  | 1. 13596000  |
| H | 3. 25434400  | 2. 51092000  | -0. 00294500 |
| C | 0. 60998800  | 4. 16336200  | 2. 29580000  |
| H | -0. 52146900 | 2. 34921200  | 2. 05718200  |
| C | 1. 77880800  | 4. 85408800  | 1. 96395000  |
| H | 3. 63390100  | 4. 78200800  | 0. 86797100  |
| H | -0. 14349300 | 4. 63657800  | 2. 91891800  |
| H | 1. 94342500  | 5. 85993100  | 2. 33883100  |
| C | 5. 73675500  | -0. 48228200 | 2. 35408900  |
| C | 7. 02374600  | -0. 60697600 | 1. 79676200  |
| C | 5. 54815000  | -0. 44533600 | 3. 74754000  |
| C | 8. 12059200  | -0. 69531200 | 2. 64836400  |
| H | 7. 14403200  | -0. 63050200 | 0. 71831800  |
| C | 6. 65813400  | -0. 53502900 | 4. 58128500  |
| H | 4. 54830000  | -0. 34731200 | 4. 15688300  |
| C | 7. 93892100  | -0. 65975100 | 4. 03407200  |
| H | 9. 11780700  | -0. 79101600 | 2. 23152500  |
| H | 6. 52594600  | -0. 50766100 | 5. 65789000  |
| H | 8. 80003500  | -0. 72893700 | 4. 69159300  |
| C | -3. 47068300 | 0. 25712700  | 4. 55420700  |
| C | -3. 96193000 | 0. 83913000  | 5. 73176900  |

|   |             |             |            |
|---|-------------|-------------|------------|
| C | -4.18954100 | 0.40464000  | 3.35708400 |
| C | -5.16021000 | 1.55568800  | 5.70977100 |
| H | -3.41027000 | 0.74103300  | 6.66118500 |
| C | -5.38782400 | 1.11708700  | 3.34243100 |
| H | -3.81031800 | -0.03505100 | 2.43853600 |
| C | -5.87365500 | 1.69443200  | 4.51822500 |
| H | -5.53313300 | 2.00671300  | 6.62438900 |
| H | -5.93818700 | 1.22675300  | 2.41291900 |
| H | -6.80376900 | 2.25453600  | 4.50402100 |
| C | -2.41492300 | -2.48268500 | 4.74704200 |
| C | -1.54676200 | -3.49180900 | 4.30164800 |
| C | -3.62698300 | -2.83453500 | 5.35981800 |
| C | -1.88251900 | -4.83377100 | 4.47756800 |
| H | -0.61356100 | -3.22624900 | 3.81242500 |
| C | -3.95994600 | -4.17950000 | 5.52878400 |
| H | -4.31258700 | -2.06367300 | 5.69673300 |
| C | -3.08934700 | -5.17888500 | 5.09023000 |
| H | -1.20655000 | -5.60868300 | 4.12888800 |
| H | -4.90164200 | -4.44478800 | 5.99973600 |
| H | -3.35334700 | -6.22413600 | 5.21988300 |
| C | -0.99531000 | -0.25531300 | 6.05463600 |
| C | -0.22806500 | 0.92132400  | 6.03829700 |
| C | -1.05528000 | -1.02347100 | 7.22591500 |
| C | 0.45831400  | 1.32644800  | 7.18214600 |
| H | -0.16698100 | 1.51784800  | 5.13217800 |
| C | -0.36010200 | -0.61576300 | 8.36656800 |
| H | -1.63725400 | -1.93889600 | 7.24989500 |
| C | 0.39419200  | 0.55810500  | 8.34744600 |
| H | 1.04575300  | 2.23957600  | 7.16207000 |
| H | -0.41016900 | -1.21749900 | 9.26905800 |
| H | 0.93240200  | 0.87291600  | 9.23652200 |

8

|   |            |             |             |
|---|------------|-------------|-------------|
| C | 4.18317500 | -0.61050900 | 1.13644700  |
| N | 3.52465000 | -0.27518800 | 0.24161300  |
| C | 2.96511100 | 0.06351100  | -0.99145300 |
| C | 1.78597600 | 0.74013500  | -1.02265200 |
| C | 1.03061600 | 0.96059700  | 0.28514200  |

|    |             |             |             |
|----|-------------|-------------|-------------|
| N  | 0.70786300  | -0.10186600 | 0.90371700  |
| N  | 3.69339600  | -0.43806900 | -2.10089800 |
| C  | 3.62562800  | -1.90478800 | -2.28514800 |
| H  | 2.57115700  | -2.18293400 | -2.32366000 |
| H  | 4.08393200  | -2.17428000 | -3.23853900 |
| H  | 4.12850000  | -2.45789000 | -1.48422300 |
| Au | -0.33706300 | -0.30248700 | 2.63139800  |
| P  | -1.49879600 | -0.67717900 | 4.62060400  |
| S  | 5.30016100  | 0.23832900  | -2.21496100 |
| O  | 5.16045400  | 1.64277900  | -1.78767300 |
| O  | 6.25627800  | -0.67025500 | -1.53954500 |
| C  | 5.60566100  | 0.18377500  | -3.99193900 |
| H  | 4.78449700  | 0.68994900  | -4.49894100 |
| H  | 6.54631200  | 0.71632100  | -4.14577500 |
| H  | 5.70524600  | -0.85131000 | -4.31785200 |
| C  | 1.16823000  | 1.20154400  | -2.27759300 |
| C  | -0.21686200 | 1.03235100  | -2.45882300 |
| C  | 1.91676000  | 1.84803900  | -3.27909100 |
| C  | -0.82986300 | 1.46238000  | -3.63301600 |
| H  | -0.80052300 | 0.54231500  | -1.68600000 |
| C  | 1.29162400  | 2.29952400  | -4.43850800 |
| H  | 2.97195500  | 2.03663800  | -3.11630300 |
| C  | -0.07871000 | 2.09807600  | -4.62424900 |
| H  | -1.89581500 | 1.30980600  | -3.77070300 |
| H  | 1.87155400  | 2.81889700  | -5.19560400 |
| H  | -0.56102400 | 2.44631900  | -5.53254300 |
| C  | 0.77687300  | 2.39990400  | 0.62679200  |
| C  | 1.76043700  | 3.36178400  | 0.34288100  |
| C  | -0.41401000 | 2.81372900  | 1.24236600  |
| C  | 1.56996700  | 4.69844400  | 0.69350300  |
| H  | 2.68702600  | 3.06357300  | -0.14095000 |
| C  | -0.61039700 | 4.15176500  | 1.57863200  |
| H  | -1.19396500 | 2.08521100  | 1.44350500  |
| C  | 0.38336100  | 5.09715300  | 1.31096700  |
| H  | 2.34665600  | 5.42723800  | 0.48176100  |
| H  | -1.54389600 | 4.45956300  | 2.04086100  |
| H  | 0.22965900  | 6.13920400  | 1.57509100  |
| C  | 5.01284400  | -0.99790100 | 2.20936300  |

|   |             |             |            |
|---|-------------|-------------|------------|
| C | 6.39027200  | -1.17888400 | 1.95305400 |
| C | 4.46683200  | -1.19118100 | 3.49588100 |
| C | 7.21482300  | -1.56223600 | 3.00392300 |
| H | 6.77573700  | -1.01972300 | 0.95083300 |
| C | 5.31689900  | -1.56622400 | 4.52855700 |
| H | 3.40562100  | -1.04178500 | 3.66486600 |
| C | 6.68249500  | -1.75292300 | 4.28367600 |
| H | 8.27509300  | -1.70852700 | 2.82688200 |
| H | 4.91680900  | -1.71507100 | 5.52588300 |
| H | 7.33703200  | -2.04817200 | 5.09787200 |
| C | -3.08901400 | 0.25090000  | 4.67644400 |
| C | -3.54611700 | 0.87642500  | 5.84522500 |
| C | -3.86946300 | 0.30768700  | 3.51037500 |
| C | -4.77090300 | 1.54716900  | 5.84558300 |
| H | -2.94798100 | 0.84750900  | 6.75019900 |
| C | -5.09359700 | 0.97488300  | 3.51810200 |
| H | -3.51919800 | -0.16961200 | 2.59898800 |
| C | -5.54480100 | 1.59660400  | 4.68516900 |
| H | -5.11745600 | 2.03199700  | 6.75323200 |
| H | -5.69212900 | 1.01358700  | 2.61298100 |
| H | -6.49572400 | 2.12075500  | 4.68826600 |
| C | -1.93288400 | -2.43910000 | 4.93341300 |
| C | -1.08983200 | -3.44337200 | 4.43301900 |
| C | -3.07448300 | -2.79735600 | 5.66690700 |
| C | -1.37848100 | -4.78649800 | 4.67399400 |
| H | -0.21523300 | -3.17272000 | 3.84783000 |
| C | -3.36055800 | -4.14289100 | 5.90167400 |
| H | -3.74305400 | -2.03058700 | 6.04507600 |
| C | -2.51364000 | -5.13726300 | 5.40788300 |
| H | -0.72357900 | -5.55805100 | 4.28050700 |
| H | -4.24779200 | -4.41327500 | 6.46612900 |
| H | -2.74194300 | -6.18338500 | 5.58826600 |
| C | -0.53596600 | -0.10655100 | 6.08569900 |
| C | 0.12274500  | 1.13208200  | 6.00229900 |
| C | -0.44903400 | -0.85726500 | 7.26614600 |
| C | 0.84922400  | 1.61374400  | 7.09019800 |
| H | 0.06387600  | 1.71755900  | 5.08857000 |
| C | 0.28669800  | -0.37230900 | 8.35020000 |

|   |             |             |            |
|---|-------------|-------------|------------|
| H | -0.95080100 | -1.81624100 | 7.34178800 |
| C | 0.93364400  | 0.86115200  | 8.26491200 |
| H | 1.35084600  | 2.57428000  | 7.02000200 |
| H | 0.35010300  | -0.95957900 | 9.26138400 |
| H | 1.50233200  | 1.23624600  | 9.11057700 |

1

|    |             |             |             |
|----|-------------|-------------|-------------|
| C  | 1.62057100  | 0.13968100  | -0.04753900 |
| C  | 1.05583600  | -0.99950600 | -0.17922100 |
| N  | 2.08653200  | 1.33231200  | 0.07381200  |
| C  | 2.47883400  | 1.93498300  | 1.37559900  |
| H  | 3.19141500  | 2.73820200  | 1.19394900  |
| H  | 1.59825600  | 2.33965300  | 1.87959600  |
| H  | 2.93621700  | 1.15447400  | 1.98340200  |
| Au | -1.01446800 | -0.46246000 | 0.06412000  |
| P  | -3.28854500 | 0.09434400  | 0.23178100  |
| S  | 1.84442900  | 2.49678000  | -1.34080500 |
| O  | 0.57219300  | 2.10461300  | -1.95960000 |
| O  | 2.09104600  | 3.81893800  | -0.75613700 |
| C  | 3.20636000  | 2.01920100  | -2.42212300 |
| H  | 3.07949800  | 0.97198100  | -2.69786700 |
| H  | 3.13036000  | 2.65887600  | -3.30440900 |
| H  | 4.14538000  | 2.19706900  | -1.89752000 |
| C  | 1.53245600  | -2.34623800 | -0.49006200 |
| C  | 2.89515200  | -2.57224500 | -0.77205400 |
| C  | 0.64659200  | -3.43744300 | -0.50784100 |
| C  | 3.35233800  | -3.85147500 | -1.06638900 |
| H  | 3.59236800  | -1.73911500 | -0.75341800 |
| C  | 1.10844800  | -4.71847500 | -0.80259600 |
| H  | -0.40289500 | -3.27577600 | -0.28218300 |
| C  | 2.45947700  | -4.92822900 | -1.08346700 |
| H  | 4.40422500  | -4.01274200 | -1.28055800 |
| H  | 0.41414800  | -5.55268500 | -0.81080700 |
| H  | 2.81863500  | -5.92669900 | -1.31250500 |
| C  | -3.49217100 | 1.88985700  | 0.56688800  |
| C  | -4.47076000 | 2.36340300  | 1.45293900  |
| C  | -2.65524900 | 2.79985300  | -0.10132000 |
| C  | -4.61187200 | 3.73632500  | 1.66395100  |
| H  | -5.11616300 | 1.66838500  | 1.98000200  |
| C  | -2.80640800 | 4.16926600  | 0.11265400  |
| H  | -1.88793500 | 2.44495600  | -0.78466100 |
| C  | -3.78282100 | 4.63844600  | 0.99545200  |
| H  | -5.36914500 | 4.09819600  | 2.35259900  |
| H  | -2.15844100 | 4.86853500  | -0.40685200 |
| H  | -3.89445000 | 5.70521800  | 1.16389200  |
| C  | -4.19520800 | -0.26770100 | -1.32418000 |

|   |             |             |             |
|---|-------------|-------------|-------------|
| C | -3.90106500 | -1.45077400 | -2.02079800 |
| C | -5.18315200 | 0.59934200  | -1.81318300 |
| C | -4.59353500 | -1.76501300 | -3.18878100 |
| H | -3.13177500 | -2.12400000 | -1.65201800 |
| C | -5.87039600 | 0.28007100  | -2.98567600 |
| H | -5.41133700 | 1.52108200  | -1.28815400 |
| C | -5.57762100 | -0.89908200 | -3.67270000 |
| H | -4.36124700 | -2.68065200 | -3.72374300 |
| H | -6.63183200 | 0.95603100  | -3.36231300 |
| H | -6.11176300 | -1.14185200 | -4.58618600 |
| C | -4.14370100 | -0.81404400 | 1.57913500  |
| C | -3.44838300 | -1.07296000 | 2.77139400  |
| C | -5.47768100 | -1.22807900 | 1.44880800  |
| C | -4.08441000 | -1.73122200 | 3.82279300  |
| H | -2.41236300 | -0.76189100 | 2.87643800  |
| C | -6.10686600 | -1.89054300 | 2.50423600  |
| H | -6.02174600 | -1.04076600 | 0.52876000  |
| C | -5.41325700 | -2.14159900 | 3.68938800  |
| H | -3.54166300 | -1.92928500 | 4.74190300  |
| H | -7.13824800 | -2.21207900 | 2.39733400  |
| H | -5.90523400 | -2.66015600 | 4.50655600  |

**TS1-4**

|    |             |             |             |
|----|-------------|-------------|-------------|
| C  | -4.90244500 | 0.52744600  | -0.28707200 |
| N  | -3.89333800 | 1.01078900  | 0.03871600  |
| C  | -2.08454500 | 1.03078000  | -0.06307000 |
| C  | -1.57379600 | -0.15226400 | 0.21352800  |
| N  | -1.71628800 | 2.28373800  | -0.35038400 |
| C  | -2.06048900 | 2.90913000  | -1.63694800 |
| H  | -3.13725000 | 3.10173000  | -1.70659900 |
| H  | -1.50937400 | 3.84464800  | -1.72757000 |
| H  | -1.75743800 | 2.23736600  | -2.44296600 |
| Au | 0.50751500  | -0.26545100 | -0.02631500 |
| P  | 2.85437600  | -0.35840400 | -0.19962800 |
| S  | -1.09471500 | 3.31235600  | 0.94617000  |
| O  | -0.50049000 | 2.40537300  | 1.93756700  |
| O  | -0.32647200 | 4.36704100  | 0.26747000  |
| C  | -2.58759600 | 4.04155100  | 1.65812200  |
| H  | -3.23404900 | 3.23738000  | 2.01048700  |
| H  | -2.26062200 | 4.66565000  | 2.49230000  |
| H  | -3.07854800 | 4.65116800  | 0.89864000  |
| C  | -2.28986900 | -1.32938700 | 0.73435800  |
| C  | -2.97573700 | -1.27147800 | 1.96183200  |
| C  | -2.25349600 | -2.54844500 | 0.03409600  |
| C  | -3.61831600 | -2.40246600 | 2.46652200  |
| H  | -2.97827200 | -0.34483900 | 2.52711000  |
| C  | -2.92172100 | -3.66759000 | 0.52806300  |
| H  | -1.70401400 | -2.60922400 | -0.90055000 |

|   |             |             |             |
|---|-------------|-------------|-------------|
| C | -3.60219000 | -3.60098100 | 1.74724600  |
| H | -4.12447700 | -2.34900800 | 3.42605000  |
| H | -2.89587900 | -4.59826100 | -0.03073100 |
| H | -4.09928600 | -4.48145000 | 2.14311900  |
| C | -6.15110800 | -0.05427200 | -0.63342900 |
| C | -7.01414400 | 0.61460000  | -1.52471200 |
| C | -6.50505700 | -1.29980400 | -0.07515600 |
| C | -8.23298700 | 0.03143000  | -1.85046600 |
| H | -6.72615500 | 1.57152100  | -1.94664000 |
| C | -7.72874900 | -1.86520300 | -0.41661700 |
| H | -5.82518900 | -1.80165100 | 0.60525900  |
| C | -8.58914000 | -1.20368000 | -1.29857500 |
| H | -8.90606200 | 0.53763900  | -2.53434100 |
| H | -8.01308900 | -2.82359000 | 0.00501300  |
| H | -9.54272800 | -1.65284700 | -1.55804600 |
| C | 3.54086300  | 1.30466100  | -0.58311700 |
| C | 4.65924100  | 1.47142600  | -1.41340200 |
| C | 2.91650200  | 2.43096100  | -0.02238400 |
| C | 5.14774800  | 2.75299600  | -1.67378200 |
| H | 5.14248400  | 0.60934300  | -1.86206600 |
| C | 3.40842500  | 3.70797100  | -0.28935800 |
| H | 2.04758500  | 2.31524900  | 0.61895400  |
| C | 4.52361500  | 3.86996200  | -1.11479400 |
| H | 6.01261500  | 2.87698000  | -2.31849200 |
| H | 2.90866000  | 4.57148700  | 0.13812000  |
| H | 4.90248900  | 4.86532000  | -1.32668500 |
| C | 3.65165600  | -0.91822900 | 1.36003300  |
| C | 3.04592700  | -1.95218400 | 2.09182100  |
| C | 4.84731700  | -0.34959100 | 1.82198300  |
| C | 3.63626600  | -2.41699200 | 3.26599600  |
| H | 2.11331700  | -2.38958200 | 1.74538900  |
| C | 5.43072300  | -0.81640800 | 3.00133200  |
| H | 5.31718700  | 0.45770600  | 1.26970200  |
| C | 4.82813300  | -1.84855200 | 3.72234600  |
| H | 3.16246200  | -3.21621200 | 3.82770200  |
| H | 6.35434100  | -0.36983600 | 3.35677500  |
| H | 5.28308700  | -2.20637200 | 4.64101100  |
| C | 3.44575600  | -1.48894300 | -1.52547700 |
| C | 2.72486300  | -1.54667000 | -2.72900100 |
| C | 4.59992600  | -2.27076700 | -1.37204000 |
| C | 3.16002900  | -2.36765200 | -3.76805800 |
| H | 1.82422900  | -0.95069700 | -2.85060700 |
| C | 5.02779400  | -3.09523500 | -2.41464800 |
| H | 5.15990000  | -2.24208000 | -0.44294000 |
| C | 4.31134500  | -3.14361200 | -3.61141800 |
| H | 2.59830300  | -2.40654700 | -4.69646300 |
| H | 5.92035400  | -3.70044200 | -2.28848800 |
| H | 4.64613200  | -3.78757200 | -4.41899600 |

## 4

|    |             |             |             |
|----|-------------|-------------|-------------|
| C  | 4.89363000  | -0.39119500 | -0.37846300 |
| N  | 3.74917300  | -0.57774100 | -0.33510100 |
| C  | 2.35320800  | -0.71981900 | -0.33714400 |
| C  | 1.56872500  | 0.37278200  | -0.14502400 |
| N  | 1.97087800  | -2.06449100 | -0.56253700 |
| C  | 1.38263100  | -2.40120100 | -1.87311400 |
| H  | 2.07982700  | -2.08319900 | -2.65201000 |
| H  | 1.25466300  | -3.48259300 | -1.95037100 |
| H  | 0.41310900  | -1.91861900 | -2.03105000 |
| Au | -0.49389100 | 0.25555800  | -0.15357900 |
| P  | -2.86784900 | 0.20619900  | -0.07571700 |
| S  | 1.29405900  | -2.88138000 | 0.81639400  |
| O  | 1.68663800  | -2.09216400 | 1.99571000  |
| O  | -0.11196700 | -3.22859800 | 0.52619200  |
| C  | 2.23527300  | -4.42524700 | 0.82714400  |
| H  | 3.28467800  | -4.18993000 | 1.00187500  |
| H  | 1.83136000  | -5.02397600 | 1.64568300  |
| H  | 2.09455100  | -4.94502000 | -0.12101800 |
| C  | 2.17357200  | 1.68422700  | 0.17721200  |
| C  | 2.97153200  | 1.84256200  | 1.32739600  |
| C  | 1.91803300  | 2.80928200  | -0.62771200 |
| C  | 3.50631300  | 3.09041300  | 1.65185500  |
| H  | 3.12829200  | 0.99370500  | 1.98726200  |
| C  | 2.48368200  | 4.04478400  | -0.31826500 |
| H  | 1.28048700  | 2.70538300  | -1.50061500 |
| C  | 3.27610400  | 4.19178200  | 0.82332900  |
| H  | 4.09083900  | 3.20445800  | 2.56048500  |
| H  | 2.29086500  | 4.89934000  | -0.95980500 |
| H  | 3.69367700  | 5.16161200  | 1.07589800  |
| C  | 6.28387700  | -0.13600400 | -0.39376500 |
| C  | 7.18025100  | -1.12663800 | -0.84741000 |
| C  | 6.74687300  | 1.12194500  | 0.05003600  |
| C  | 8.54158300  | -0.84960100 | -0.84895400 |
| H  | 6.80724400  | -2.08647100 | -1.18794600 |
| C  | 8.11335300  | 1.37447000  | 0.03519200  |
| H  | 6.03930000  | 1.86911800  | 0.39387400  |
| C  | 9.00701900  | 0.39506400  | -0.41065400 |
| H  | 9.24186400  | -1.60292800 | -1.19380600 |
| H  | 8.48349000  | 2.33684200  | 0.37250100  |
| H  | 10.07237500 | 0.60255900  | -0.41748200 |
| C  | -3.59234400 | -1.09329400 | -1.15969000 |
| C  | -4.70507400 | -0.84544800 | -1.97557900 |
| C  | -3.00561900 | -2.37014000 | -1.14656000 |
| C  | -5.22681700 | -1.86710300 | -2.77195200 |
| H  | -5.16205100 | 0.13842100  | -1.99388900 |
| C  | -3.53869100 | -3.38570300 | -1.93984600 |



|   |             |             |             |
|---|-------------|-------------|-------------|
| H | -2.14211100 | -2.57216900 | -0.51856400 |
| C | -4.64613900 | -3.13597300 | -2.75459400 |
| H | -6.08721200 | -1.66899900 | -3.40400700 |
| H | -3.08619800 | -4.37274600 | -1.92242100 |
| H | -5.05469000 | -3.92835300 | -3.37466500 |
| C | -3.49456400 | -0.13146800 | 1.62071000  |
| C | -2.80120700 | 0.40748100  | 2.71602600  |
| C | -4.65035100 | -0.89531600 | 1.84021300  |
| C | -3.26482400 | 0.19159700  | 4.01310200  |
| H | -1.89906200 | 0.99158300  | 2.55537900  |
| C | -5.10712400 | -1.11087700 | 3.14146700  |
| H | -5.18796300 | -1.32643300 | 1.00181700  |
| C | -4.41704400 | -0.56848900 | 4.22696900  |
| H | -2.72219600 | 0.60963800  | 4.85542400  |
| H | -6.00042600 | -1.70595400 | 3.30526700  |
| H | -4.77310100 | -0.74174100 | 5.23801700  |
| C | -3.62337400 | 1.80142400  | -0.60069600 |
| C | -3.03960200 | 2.50204900  | -1.66839000 |
| C | -4.76773600 | 2.32027100  | 0.02220900  |
| C | -3.59804200 | 3.70040300  | -2.11086900 |
| H | -2.14939700 | 2.10906700  | -2.15244000 |
| C | -5.31890600 | 3.52406700  | -0.42093800 |
| H | -5.22421800 | 1.79178200  | 0.85277200  |
| C | -4.73716000 | 4.21373700  | -1.48593300 |
| H | -3.14171500 | 4.23547700  | -2.93822500 |
| H | -6.20232800 | 3.92225600  | 0.06886300  |
| H | -5.16776900 | 5.15063400  | -1.82620300 |

#### TS<sub>4-5</sub>

|    |             |             |             |
|----|-------------|-------------|-------------|
| C  | 4.41335400  | 0.38923600  | 0.13303100  |
| N  | 3.44040100  | 0.92841400  | 0.60053200  |
| C  | 2.03352400  | 0.95021700  | 0.58533200  |
| C  | 1.25969000  | -0.09201600 | 0.99191600  |
| C  | 3.05799300  | -1.39910000 | -1.62162300 |
| N  | 4.00390600  | -0.92204900 | -1.12534500 |
| N  | 1.50746400  | 2.21500000  | 0.20701800  |
| C  | 0.97913000  | 3.14059600  | 1.21958100  |
| H  | 1.78477100  | 3.58634200  | 1.81926300  |
| H  | 0.41015100  | 3.92732800  | 0.72187400  |
| H  | 0.29895400  | 2.59374100  | 1.87836100  |
| Au | -0.78268700 | 0.02439700  | 0.67406400  |
| P  | -3.12410200 | 0.15303700  | 0.26870800  |
| S  | 1.64775200  | 2.74947700  | -1.39718100 |
| O  | 2.10258600  | 1.57991500  | -2.17775100 |
| O  | 0.41426500  | 3.48499000  | -1.74101300 |
| C  | 2.99257400  | 3.95993200  | -1.38850000 |
| H  | 3.91047200  | 3.46098800  | -1.07709500 |
| H  | 3.08699500  | 4.33943000  | -2.40738000 |

|   |              |              |              |
|---|--------------|--------------|--------------|
| H | 2. 73524000  | 4. 77254600  | -0. 70644600 |
| C | 1. 82512600  | -1. 27984900 | 1. 67207200  |
| C | 1. 31421400  | -2. 56299000 | 1. 39162300  |
| C | 2. 82155800  | -1. 17218800 | 2. 66303200  |
| C | 1. 83389300  | -3. 69609100 | 2. 00993200  |
| H | 0. 46667100  | -2. 66029100 | 0. 71324200  |
| C | 3. 31547800  | -2. 30222900 | 3. 30985300  |
| H | 3. 19199100  | -0. 19205500 | 2. 94901700  |
| C | 2. 84084700  | -3. 57283000 | 2. 97335500  |
| H | 1. 43065600  | -4. 67620200 | 1. 76770400  |
| H | 4. 06926300  | -2. 19224200 | 4. 08561700  |
| H | 3. 22926700  | -4. 45279900 | 3. 47479000  |
| C | 1. 99068700  | -2. 07278100 | -2. 27447300 |
| C | 1. 95785800  | -3. 48182000 | -2. 23997500 |
| C | 0. 98781500  | -1. 33625100 | -2. 93833400 |
| C | 0. 92033000  | -4. 15093800 | -2. 87622300 |
| H | 2. 73659300  | -4. 02948600 | -1. 71632800 |
| C | -0. 04681100 | -2. 02790200 | -3. 56632600 |
| H | 1. 03352400  | -0. 25389200 | -2. 93772700 |
| C | -0. 07500600 | -3. 42468500 | -3. 53982800 |
| H | 0. 88881700  | -5. 23509600 | -2. 85955600 |
| H | -0. 82346400 | -1. 47789100 | -4. 08254800 |
| H | -0. 88236200 | -3. 95668300 | -4. 03813000 |
| C | 5. 85061400  | 0. 42555600  | 0. 27716900  |
| C | 6. 72020600  | -0. 36369900 | -0. 49116700 |
| C | 6. 37106300  | 1. 31880800  | 1. 23517100  |
| C | 8. 09454600  | -0. 25731300 | -0. 30224700 |
| H | 6. 31300300  | -1. 05133900 | -1. 22141300 |
| C | 7. 74457900  | 1. 41738100  | 1. 41581500  |
| H | 5. 69271800  | 1. 92473200  | 1. 82866500  |
| C | 8. 60842900  | 0. 62769300  | 0. 64722100  |
| H | 8. 76522100  | -0. 87061400 | -0. 89470100 |
| H | 8. 14661100  | 2. 10554300  | 2. 15262000  |
| H | 9. 68424400  | 0. 70387600  | 0. 78968200  |
| C | -3. 65969400 | 1. 84678200  | -0. 21017600 |
| C | -4. 95537800 | 2. 31720300  | 0. 05269800  |
| C | -2. 74211800 | 2. 67412700  | -0. 87587800 |
| C | -5. 32548000 | 3. 60082600  | -0. 34910800 |
| H | -5. 66878600 | 1. 69304000  | 0. 57696300  |
| C | -3. 11759800 | 3. 95522100  | -1. 27910200 |
| H | -1. 73008400 | 2. 33530500  | -1. 07756500 |
| C | -4. 40793400 | 4. 42103000  | -1. 01732000 |
| H | -6. 32474600 | 3. 96327600  | -0. 14131400 |
| H | -2. 39558700 | 4. 58223600  | -1. 78849500 |
| H | -4. 70138900 | 5. 42036200  | -1. 32479600 |
| C | -3. 63928300 | -0. 96584500 | -1. 11143900 |
| C | -3. 33680700 | -2. 33542100 | -1. 00044100 |
| C | -4. 27932900 | -0. 48850600 | -2. 25807900 |

|   |             |             |             |
|---|-------------|-------------|-------------|
| C | -3.68672400 | -3.21320200 | -2.02220700 |
| H | -2.82518300 | -2.70996400 | -0.11650700 |
| C | -4.62463900 | -1.37488200 | -3.28433600 |
| H | -4.51787500 | 0.56526800  | -2.35705400 |
| C | -4.33737400 | -2.73528800 | -3.16490700 |
| H | -3.45486600 | -4.27370700 | -1.92603700 |
| H | -5.13031200 | -0.99970000 | -4.16902600 |
| H | -4.61491800 | -3.42165000 | -3.95859400 |
| C | -4.15387200 | -0.34259000 | 1.71171400  |
| C | -3.65815700 | -0.11710800 | 3.00355600  |
| C | -5.42990400 | -0.90902400 | 1.54528700  |
| C | -4.43314900 | -0.43973700 | 4.11752700  |
| H | -2.66866400 | 0.30569700  | 3.13743200  |
| C | -6.19699600 | -1.23468100 | 2.66333300  |
| H | -5.81741300 | -1.10555000 | 0.55166600  |
| C | -5.70395800 | -0.99804500 | 3.94888200  |
| H | -4.04226000 | -0.26410500 | 5.11651200  |
| H | -7.18263300 | -1.67137600 | 2.53070500  |
| H | -6.30189500 | -1.25395600 | 4.81621700  |

## 5

|    |             |             |             |
|----|-------------|-------------|-------------|
| C  | -4.29675100 | 0.22014000  | -0.07101300 |
| N  | -3.46358600 | 0.87625800  | -0.77616100 |
| C  | -2.06497500 | 0.81550800  | -0.69805500 |
| C  | -1.27764400 | -0.26638700 | -0.97778100 |
| C  | -2.82639700 | -1.05014900 | 1.49296800  |
| N  | -3.80239000 | -0.66032200 | 0.96457600  |
| N  | -1.47370900 | 2.09715200  | -0.44965700 |
| C  | -1.02499800 | 2.92149600  | -1.58321700 |
| H  | -1.86613000 | 3.27459100  | -2.19249300 |
| H  | -0.45930300 | 3.77174400  | -1.19915900 |
| H  | -0.36001300 | 2.31863200  | -2.20450800 |
| Au | 0.76794800  | -0.09213200 | -0.67354600 |
| P  | 3.09880900  | 0.13912600  | -0.25179700 |
| S  | -1.77998500 | 2.87525000  | 1.02220700  |
| O  | -2.21956300 | 1.81234200  | 1.95890500  |
| O  | -0.61448000 | 3.72825300  | 1.32385300  |
| C  | -3.19251600 | 3.97465200  | 0.75552900  |
| H  | -4.04742400 | 3.37691900  | 0.43993100  |
| H  | -3.39179800 | 4.46956300  | 1.70774800  |
| H  | -2.92539600 | 4.71351700  | -0.00118800 |
| C  | -1.82606100 | -1.51968300 | -1.54378000 |
| C  | -1.27938200 | -2.76577800 | -1.17106300 |
| C  | -2.84856900 | -1.52153100 | -2.51680000 |
| C  | -1.76506700 | -3.95836300 | -1.70491700 |
| H  | -0.45755300 | -2.78719100 | -0.46128600 |
| C  | -3.31675800 | -2.71283300 | -3.06714800 |
| H  | -3.25803200 | -0.57794700 | -2.86219900 |

|   |             |             |             |
|---|-------------|-------------|-------------|
| C | -2.78772300 | -3.93840600 | -2.65583600 |
| H | -1.32773100 | -4.90377800 | -1.39632700 |
| H | -4.09212300 | -2.68349800 | -3.82717700 |
| H | -3.15328000 | -4.86512500 | -3.08747300 |
| C | -1.82779700 | -1.67338400 | 2.26223700  |
| C | -1.79952600 | -3.08650600 | 2.33556800  |
| C | -0.87875900 | -0.88126700 | 2.94820500  |
| C | -0.81687300 | -3.69584700 | 3.10271300  |
| H | -2.53176100 | -3.67326700 | 1.79255400  |
| C | 0.09528500  | -1.51908200 | 3.70614800  |
| H | -0.93440100 | 0.19815700  | 2.86552600  |
| C | 0.12757800  | -2.91552600 | 3.78196300  |
| H | -0.78230000 | -4.77799200 | 3.17176000  |
| H | 0.83856600  | -0.92880800 | 4.23091500  |
| H | 0.89788700  | -3.40110700 | 4.37268100  |
| C | -5.75398600 | 0.28931900  | -0.18567300 |
| C | -6.58631300 | -0.43489500 | 0.68379200  |
| C | -6.32696200 | 1.09904300  | -1.18403900 |
| C | -7.97066500 | -0.34307900 | 0.56228500  |
| H | -6.15162100 | -1.06627600 | 1.45183700  |
| C | -7.70905800 | 1.18408500  | -1.29990200 |
| H | -5.67743200 | 1.64782500  | -1.85716900 |
| C | -8.53401800 | 0.46478800  | -0.42746700 |
| H | -8.60891800 | -0.90317300 | 1.23800500  |
| H | -8.14773300 | 1.80842600  | -2.07177200 |
| H | -9.61334400 | 0.53246400  | -0.52259700 |
| C | 3.56822400  | 1.87908700  | 0.12479800  |
| C | 4.87438400  | 2.35354200  | -0.07554300 |
| C | 2.58939100  | 2.74334200  | 0.64019200  |
| C | 5.19326200  | 3.67355500  | 0.24292100  |
| H | 5.63676400  | 1.70057700  | -0.48809000 |
| C | 2.91567900  | 4.06189500  | 0.96066000  |
| H | 1.56929800  | 2.40315000  | 0.78747400  |
| C | 4.21650300  | 4.52755300  | 0.76225600  |
| H | 6.20402800  | 4.03590300  | 0.08130200  |
| H | 2.14452600  | 4.71573700  | 1.35559700  |
| H | 4.46965700  | 5.55523200  | 1.00556900  |
| C | 3.62937200  | -0.86672300 | 1.20455900  |
| C | 3.46425900  | -2.26089200 | 1.14549000  |
| C | 4.14725200  | -0.28414600 | 2.36862500  |
| C | 3.82656700  | -3.05815300 | 2.22983800  |
| H | 3.06461300  | -2.72294000 | 0.24653500  |
| C | 4.49969500  | -1.08706600 | 3.45729500  |
| H | 4.28193400  | 0.79079800  | 2.42706400  |
| C | 4.34390800  | -2.47198500 | 3.38942400  |
| H | 3.71251900  | -4.13651900 | 2.16740900  |
| H | 4.90726300  | -0.62714500 | 4.35270500  |
| H | 4.63229500  | -3.09407400 | 4.23174300  |

|   |            |             |             |
|---|------------|-------------|-------------|
| C | 4.17885100 | -0.41242000 | -1.63691800 |
| C | 3.70588300 | -0.27860600 | -2.95164000 |
| C | 5.46543500 | -0.92845800 | -1.41541800 |
| C | 4.51348500 | -0.64380700 | -4.02869400 |
| H | 2.70589000 | 0.10638200  | -3.13140000 |
| C | 6.26815200 | -1.29438700 | -2.49672100 |
| H | 5.83688200 | -1.05330400 | -0.40309700 |
| C | 5.79466900 | -1.15112100 | -3.80251900 |
| H | 4.13938100 | -0.53841600 | -5.04249000 |
| H | 7.26188500 | -1.69373600 | -2.31779900 |
| H | 6.42061500 | -1.43928600 | -4.64162700 |

**TS<sub>5-6</sub>**

|    |             |             |             |
|----|-------------|-------------|-------------|
| C  | -4.24856800 | 0.21330300  | 0.05812700  |
| N  | -3.49218800 | 0.89476600  | -0.73405100 |
| C  | -2.12910000 | 0.85806100  | -0.66777300 |
| C  | -1.36852600 | -0.32833900 | -0.75361900 |
| C  | -2.43098100 | -0.69103800 | 1.20732200  |
| N  | -3.64310900 | -0.51097000 | 1.12232300  |
| N  | -1.47064500 | 2.10208900  | -0.55313900 |
| C  | -0.81866500 | 2.68926400  | -1.73869300 |
| H  | -1.55669500 | 3.06013900  | -2.46164100 |
| H  | -0.17301300 | 3.50172800  | -1.41326500 |
| H  | -0.20154700 | 1.92331600  | -2.21410700 |
| Au | 0.70981000  | -0.18296300 | -0.51287600 |
| P  | 3.05226700  | 0.08239800  | -0.23323000 |
| S  | -1.81180500 | 3.11206100  | 0.78334500  |
| O  | -2.21677400 | 2.19310100  | 1.86424600  |
| O  | -0.65271400 | 4.01329400  | 0.91538500  |
| C  | -3.24109400 | 4.12094600  | 0.32480500  |
| H  | -4.07850900 | 3.46006000  | 0.10568700  |
| H  | -3.46101200 | 4.76075400  | 1.18084100  |
| H  | -2.97218300 | 4.72951400  | -0.53969600 |
| C  | -1.89037400 | -1.55949400 | -1.40834600 |
| C  | -1.32228500 | -2.81220200 | -1.09039100 |
| C  | -2.87112800 | -1.52048500 | -2.42183400 |
| C  | -1.74943200 | -3.97758300 | -1.72438700 |
| H  | -0.54299300 | -2.86334300 | -0.33964400 |
| C  | -3.27511700 | -2.68470400 | -3.07257400 |
| H  | -3.30534900 | -0.57152100 | -2.71692200 |
| C  | -2.72840700 | -3.91963600 | -2.71905000 |
| H  | -1.30389600 | -4.92997700 | -1.45292100 |
| H  | -4.01865400 | -2.62474000 | -3.86174900 |
| H  | -3.04677900 | -4.82506300 | -3.22752300 |
| C  | -1.53223800 | -1.39259900 | 2.08387600  |
| C  | -1.84082400 | -2.71556800 | 2.46424700  |
| C  | -0.38064500 | -0.75377600 | 2.58583900  |
| C  | -0.98870800 | -3.39089800 | 3.33334300  |
| H  | -2.73242500 | -3.19603900 | 2.07223100  |

|   |             |             |             |
|---|-------------|-------------|-------------|
| C | 0.46053000  | -1.44122700 | 3.45349200  |
| H | -0.18829700 | 0.27955400  | 2.31211200  |
| C | 0.16042500  | -2.75442700 | 3.82135100  |
| H | -1.21568900 | -4.40819500 | 3.62834400  |
| H | 1.37780600  | -0.96933200 | 3.81371900  |
| H | 0.83146100  | -3.29154500 | 4.48965600  |
| C | -5.70201200 | 0.16938500  | -0.03953200 |
| C | -6.45599700 | -0.55953800 | 0.89801300  |
| C | -6.35803700 | 0.86004500  | -1.07864800 |
| C | -7.84448800 | -0.58874100 | 0.80041300  |
| H | -5.95018200 | -1.09682600 | 1.69034300  |
| C | -7.74323100 | 0.82368300  | -1.16928100 |
| H | -5.76941800 | 1.42093500  | -1.79682800 |
| C | -8.48875800 | 0.10073100  | -0.22953900 |
| H | -8.42737200 | -1.14895600 | 1.52672300  |
| H | -8.24765000 | 1.35810200  | -1.96797100 |
| H | -9.57177600 | 0.07580000  | -0.30282900 |
| C | 3.51527700  | 1.86046500  | -0.09416300 |
| C | 4.79650300  | 2.31935800  | -0.43903700 |
| C | 2.56008800  | 2.77214500  | 0.38339100  |
| C | 5.11364700  | 3.67079100  | -0.30107800 |
| H | 5.54098500  | 1.62945800  | -0.82324500 |
| C | 2.88404900  | 4.12230800  | 0.52268800  |
| H | 1.55841000  | 2.44281700  | 0.64112300  |
| C | 4.16058600  | 4.57211100  | 0.18041500  |
| H | 6.10505600  | 4.01975700  | -0.57362000 |
| H | 2.13032200  | 4.81169700  | 0.88970800  |
| H | 4.41237300  | 5.62346400  | 0.28274300  |
| C | 3.65202800  | -0.73313000 | 1.30969100  |
| C | 3.54567600  | -2.13258700 | 1.41400400  |
| C | 4.15647500  | 0.00400400  | 2.38681900  |
| C | 3.95571200  | -2.77987900 | 2.57816700  |
| H | 3.15413700  | -2.71180000 | 0.58314500  |
| C | 4.55320100  | -0.65215100 | 3.55930100  |
| H | 4.24723700  | 1.08231700  | 2.31792300  |
| C | 4.45828200  | -2.04025200 | 3.65432100  |
| H | 3.88511700  | -3.86096300 | 2.64390300  |
| H | 4.94935100  | -0.07306000 | 4.38882400  |
| H | 4.77990600  | -2.54825700 | 4.55835600  |
| C | 4.06087300  | -0.62876400 | -1.59824000 |
| C | 3.51929500  | -0.64882200 | -2.89300400 |
| C | 5.36027300  | -1.11266000 | -1.38485600 |
| C | 4.27416600  | -1.13903500 | -3.96054200 |
| H | 2.50991500  | -0.28510300 | -3.06749700 |
| C | 6.10669600  | -1.60463700 | -2.45344000 |
| H | 5.78446900  | -1.11653300 | -0.38572600 |
| C | 5.56757400  | -1.61872400 | -3.74323700 |
| H | 3.84754400  | -1.15276300 | -4.95881900 |

|   |            |             |             |
|---|------------|-------------|-------------|
| H | 7.11026900 | -1.98162800 | -2.28139500 |
| H | 6.15002100 | -2.00521700 | -4.57105700 |

**6**

|    |             |             |             |
|----|-------------|-------------|-------------|
| C  | 2.85673600  | -0.87294900 | 0.95569600  |
| N  | 2.63622700  | -1.12939000 | -0.33693400 |
| C  | 2.07809400  | -0.19348100 | -1.11143600 |
| C  | 1.69062200  | 1.12264800  | -0.57254100 |
| C  | 2.06117700  | 1.28398500  | 0.84031700  |
| N  | 2.58848900  | 0.30211300  | 1.56420800  |
| N  | 1.91289800  | -0.56125700 | -2.42578800 |
| C  | 1.18071900  | 0.23953100  | -3.41701700 |
| H  | 1.75495700  | 1.12089900  | -3.69951900 |
| H  | 1.02135200  | -0.38215300 | -4.29557600 |
| H  | 0.20968800  | 0.54758700  | -3.01621800 |
| Au | -0.44261400 | 0.42634000  | -0.10950400 |
| P  | -2.59784100 | -0.40582200 | 0.27088400  |
| S  | 2.09919000  | -2.30811800 | -2.85772700 |
| O  | 1.36056600  | -3.14184400 | -1.89331200 |
| O  | 1.75056400  | -2.34887200 | -4.28705000 |
| C  | 3.87632200  | -2.57990800 | -2.72487600 |
| H  | 4.18157500  | -2.43580800 | -1.69167200 |
| H  | 4.03427400  | -3.60979200 | -3.05298100 |
| H  | 4.36702100  | -1.88504100 | -3.40662800 |
| C  | 1.80797200  | 2.35873200  | -1.44617600 |
| C  | 0.72549700  | 3.11054700  | -1.92102300 |
| C  | 3.10702900  | 2.77102100  | -1.78555900 |
| C  | 0.93186000  | 4.23778600  | -2.71612900 |
| H  | -0.28943200 | 2.80872500  | -1.67707600 |
| C  | 3.31588400  | 3.89660300  | -2.58346800 |
| H  | 3.96201700  | 2.20707900  | -1.42161300 |
| C  | 2.22767800  | 4.63371000  | -3.05215400 |
| H  | 0.07882400  | 4.80584800  | -3.07475300 |
| H  | 4.32861000  | 4.19693300  | -2.83440300 |
| H  | 2.38754100  | 5.51019000  | -3.67223300 |
| C  | 1.90962200  | 2.57610300  | 1.55985900  |
| C  | 2.90405700  | 2.93095400  | 2.48956200  |
| C  | 0.81075200  | 3.43433300  | 1.38603000  |
| C  | 2.81586100  | 4.12457600  | 3.20050600  |
| H  | 3.74679900  | 2.26564300  | 2.63764600  |
| C  | 0.71331200  | 4.61660800  | 2.11601400  |
| H  | 0.01550700  | 3.16903400  | 0.69899100  |
| C  | 1.71952700  | 4.97015700  | 3.01783500  |
| H  | 3.60021900  | 4.39233900  | 3.90160800  |
| H  | -0.14985600 | 5.26117700  | 1.98185300  |
| H  | 1.64601300  | 5.89659700  | 3.57921500  |
| C  | 3.43148000  | -1.95165800 | 1.77465300  |
| C  | 3.93876000  | -1.67570300 | 3.05765600  |

|   |             |             |             |
|---|-------------|-------------|-------------|
| C | 3.46592800  | -3.27131300 | 1.28448700  |
| C | 4.49541100  | -2.69624500 | 3.82201400  |
| H | 3.89208800  | -0.66115500 | 3.43528000  |
| C | 4.01412900  | -4.28845200 | 2.05968700  |
| H | 3.02942500  | -3.48789600 | 0.31568300  |
| C | 4.53651900  | -4.00233800 | 3.32474100  |
| H | 4.89576100  | -2.47678000 | 4.80688600  |
| H | 4.02855800  | -5.30662900 | 1.68332400  |
| H | 4.96738800  | -4.79763200 | 3.92573700  |
| C | -2.99699700 | -1.73074500 | -0.93087800 |
| C | -4.31513100 | -1.93635200 | -1.36864000 |
| C | -1.96656700 | -2.56174300 | -1.39891000 |
| C | -4.59433500 | -2.97034400 | -2.26320000 |
| H | -5.11617900 | -1.29162500 | -1.02101900 |
| C | -2.25453000 | -3.59086700 | -2.29449800 |
| H | -0.93909100 | -2.41582500 | -1.07928600 |
| C | -3.56692300 | -3.79571900 | -2.72644000 |
| H | -5.61396700 | -3.12599500 | -2.60198400 |
| H | -1.44628500 | -4.21818800 | -2.65621600 |
| H | -3.78895900 | -4.59368800 | -3.42846800 |
| C | -2.74745000 | -1.10219800 | 1.96180300  |
| C | -2.13135600 | -0.43253200 | 3.03192400  |
| C | -3.47961000 | -2.27443200 | 2.20156700  |
| C | -2.25686100 | -0.92750900 | 4.32880300  |
| H | -1.55303000 | 0.47031500  | 2.85385500  |
| C | -3.59612000 | -2.76606600 | 3.50286000  |
| H | -3.95090400 | -2.80457700 | 1.38048600  |
| C | -2.98790000 | -2.09475700 | 4.56477200  |
| H | -1.77773700 | -0.40690300 | 5.15209600  |
| H | -4.16035000 | -3.67567100 | 3.68371400  |
| H | -3.07831500 | -2.48267800 | 5.57474000  |
| C | -3.88596600 | 0.89206600  | 0.09284000  |
| C | -3.84676600 | 1.72979700  | -1.03434600 |
| C | -4.90631500 | 1.04915500  | 1.04070800  |
| C | -4.82218100 | 2.70862600  | -1.21131300 |
| H | -3.06052200 | 1.61085000  | -1.77554500 |
| C | -5.87801200 | 2.03616600  | 0.85910700  |
| H | -4.94443100 | 0.40846100  | 1.91529400  |
| C | -5.83759800 | 2.86416600  | -0.26291000 |
| H | -4.78998200 | 3.35078000  | -2.08612700 |
| H | -6.66551900 | 2.15515900  | 1.59679100  |
| H | -6.59428700 | 3.63054400  | -0.39975600 |

**P**

|   |             |             |             |
|---|-------------|-------------|-------------|
| C | -1.88091700 | 0.57417100  | 0.14844200  |
| N | -1.51102700 | -0.70952000 | 0.28836100  |
| C | -0.20459200 | -0.96840900 | 0.30919300  |
| C | 0.78942000  | 0.02045100  | 0.19938600  |
| C | 0.29376500  | 1.33544000  | -0.01044200 |



|   |             |             |             |
|---|-------------|-------------|-------------|
| N | -1.02378800 | 1.58854800  | -0.01045200 |
| N | 0.17543100  | -2.33536500 | 0.53054000  |
| C | 0.00445700  | -2.84050500 | 1.89912500  |
| H | -1.03439900 | -2.76553900 | 2.24543800  |
| H | 0.33679500  | -3.87866600 | 1.92544000  |
| H | 0.64595600  | -2.25496500 | 2.56377400  |
| S | -0.07299500 | -3.42251200 | -0.75819000 |
| O | 0.31515400  | -2.68892000 | -1.97934100 |
| O | 0.57097000  | -4.68742100 | -0.36074600 |
| C | -1.85528500 | -3.73031600 | -0.85782100 |
| H | -2.36220100 | -2.77749200 | -1.00276900 |
| H | -2.00830600 | -4.39944500 | -1.70665100 |
| H | -2.17902700 | -4.21180800 | 0.06609000  |
| C | 2.23371800  | -0.29745700 | 0.38479200  |
| C | 2.90782400  | -1.18608000 | -0.46794300 |
| C | 2.93855500  | 0.29318100  | 1.44617700  |
| C | 4.25916000  | -1.46577000 | -0.26351300 |
| H | 2.36840100  | -1.65571900 | -1.28349300 |
| C | 4.28713100  | 0.00385200  | 1.65148600  |
| H | 2.42665900  | 0.98326600  | 2.11078100  |
| C | 4.95246500  | -0.87483700 | 0.79482500  |
| H | 4.76892900  | -2.15312100 | -0.93246200 |
| H | 4.81655500  | 0.46590900  | 2.47988700  |
| H | 6.00364200  | -1.09907400 | 0.95216400  |
| C | 1.15660300  | 2.52643700  | -0.25066500 |
| C | 0.76234100  | 3.76689300  | 0.27784400  |
| C | 2.31286800  | 2.46543100  | -1.04491600 |
| C | 1.52003700  | 4.91175600  | 0.04219100  |
| H | -0.14356200 | 3.81774400  | 0.87200100  |
| C | 3.05834100  | 3.61648300  | -1.29491700 |
| H | 2.62290700  | 1.52248500  | -1.47989300 |
| C | 2.67062200  | 4.84032300  | -0.74638700 |
| H | 1.20955600  | 5.86098300  | 0.46938200  |
| H | 3.94334800  | 3.55565600  | -1.92143600 |
| H | 3.25866600  | 5.73380200  | -0.93602600 |
| C | -3.33158000 | 0.88747700  | 0.16405100  |
| C | -3.77796200 | 2.18799900  | -0.12010300 |
| C | -4.27492700 | -0.10736400 | 0.46642100  |
| C | -5.13904000 | 2.48393900  | -0.10396700 |
| H | -3.04485000 | 2.95080100  | -0.35580800 |
| C | -5.63511200 | 0.19300500  | 0.48385100  |
| H | -3.92759600 | -1.10886300 | 0.69338800  |
| C | -6.07200500 | 1.48878400  | 0.19782400  |
| H | -5.47328900 | 3.49256800  | -0.32944800 |
| H | -6.35582700 | -0.58395900 | 0.72248000  |
| H | -7.13306600 | 1.72140600  | 0.21014500  |

1'

|    |             |             |             |
|----|-------------|-------------|-------------|
| C  | -1.30502300 | 1.36609800  | 0.96233200  |
| C  | -1.28820900 | 2.24032200  | 0.04625300  |
| N  | -2.06698900 | 0.93878100  | 2.01099300  |
| C  | -1.82593600 | -0.37148700 | 2.64073300  |
| H  | -0.79537700 | -0.40439700 | 3.00042500  |
| H  | -2.49810800 | -0.48772500 | 3.49071600  |
| H  | -2.00553800 | -1.19723200 | 1.94546700  |
| S  | -3.73734500 | 1.52644400  | 2.03925000  |
| O  | -3.82899300 | 2.50579700  | 0.94353900  |
| O  | -4.60818600 | 0.34685000  | 2.14257000  |
| C  | -3.77351100 | 2.41650000  | 3.60953700  |
| H  | -3.05882800 | 3.23749200  | 3.55700400  |
| H  | -4.79180500 | 2.79362700  | 3.72479500  |
| H  | -3.53416500 | 1.72603800  | 4.41879600  |
| C  | -1.18593100 | 3.15928600  | -1.01610200 |
| C  | -0.52082700 | 4.39696500  | -0.83337800 |
| C  | -1.80298600 | 2.87413600  | -2.25931700 |
| C  | -0.47286200 | 5.31785600  | -1.87109000 |
| H  | -0.05783700 | 4.61189600  | 0.12409400  |
| C  | -1.75428900 | 3.80683600  | -3.28660300 |
| H  | -2.32221400 | 1.93037700  | -2.38654200 |
| C  | -1.08973200 | 5.02386700  | -3.09345900 |
| H  | 0.03433300  | 6.26709000  | -1.73253600 |
| H  | -2.23393100 | 3.59392000  | -4.23629700 |
| H  | -1.05524900 | 5.75016700  | -3.90003400 |
| Au | 0.59628500  | 0.49041000  | 0.40250000  |
| P  | 2.61249100  | -0.64530800 | 0.00423000  |
| C  | 3.13224700  | -1.55737500 | 1.51167100  |
| C  | 3.11141600  | -0.88346700 | 2.74465500  |
| C  | 3.55176600  | -2.89351700 | 1.45533200  |
| C  | 3.51295400  | -1.54072400 | 3.90585500  |
| H  | 2.78831100  | 0.15333500  | 2.79454700  |
| C  | 3.94636100  | -3.54737600 | 2.62476000  |
| H  | 3.56814700  | -3.42369300 | 0.50903300  |
| C  | 3.92806500  | -2.87438300 | 3.84687600  |
| H  | 3.49922400  | -1.01496300 | 4.85559900  |
| H  | 4.26766000  | -4.58321500 | 2.57741700  |
| H  | 4.23492000  | -3.38700200 | 4.75333900  |
| C  | 3.97971200  | 0.49826900  | -0.43419200 |
| C  | 3.71227800  | 1.57844900  | -1.29046700 |
| C  | 5.28282400  | 0.29285200  | 0.04273800  |
| C  | 4.74097800  | 2.43878900  | -1.66994700 |
| H  | 2.70382700  | 1.74505200  | -1.65991400 |
| C  | 6.30705100  | 1.16136600  | -0.33883200 |
| H  | 5.49832100  | -0.53477100 | 0.71058700  |
| C  | 6.03815500  | 2.23190200  | -1.19321000 |
| H  | 4.53010000  | 3.27218100  | -2.33290700 |
| H  | 7.31371400  | 1.00075000  | 0.03434900  |

|   |            |             |             |
|---|------------|-------------|-------------|
| H | 6.83697600 | 2.90662300  | -1.48520900 |
| C | 2.46280700 | -1.86786700 | -1.35579400 |
| C | 3.54502200 | -2.14236700 | -2.20577100 |
| C | 1.25149700 | -2.55787500 | -1.52465500 |
| C | 3.41268000 | -3.10158100 | -3.21077700 |
| H | 4.48269200 | -1.60871600 | -2.08981400 |
| C | 1.12828000 | -3.51756900 | -2.52831700 |
| H | 0.40667400 | -2.34535100 | -0.87495500 |
| C | 2.20801100 | -3.78862300 | -3.37246000 |
| H | 4.25100500 | -3.30866900 | -3.86861900 |
| H | 0.18945900 | -4.04760100 | -2.65499100 |
| H | 2.10860800 | -4.53130900 | -4.15806000 |

**TS1'-2'**

|   |             |             |             |
|---|-------------|-------------|-------------|
| C | -1.63806900 | -1.07385600 | -0.25350000 |
| C | -2.23804200 | 0.05420000  | 0.02397000  |
| N | -2.08166800 | -2.35554100 | -0.46849600 |
| C | -3.42884500 | -2.82192400 | -0.09148700 |
| H | -4.18445400 | -2.51736600 | -0.82051300 |
| H | -3.40665300 | -3.90760000 | -0.02272200 |
| H | -3.67978200 | -2.40334300 | 0.88399800  |
| S | -1.03927000 | -3.51951400 | -1.24153300 |
| O | 0.34149100  | -3.32294900 | -0.75568900 |
| O | -1.71714100 | -4.81600000 | -1.10637200 |
| C | -1.09346600 | -3.01833200 | -2.97738400 |
| H | -0.71971000 | -1.99777800 | -3.06693100 |
| H | -0.45064300 | -3.71211500 | -3.52266400 |
| H | -2.12334700 | -3.10065700 | -3.32640400 |
| C | -2.06861800 | 1.41832600  | 0.49295300  |
| C | -1.77815200 | 1.67609800  | 1.84680000  |
| C | -2.20654700 | 2.49875100  | -0.40002400 |
| C | -1.61075700 | 2.98562300  | 2.29084100  |
| H | -1.67830300 | 0.84247700  | 2.53446800  |
| C | -2.03788400 | 3.80556200  | 0.04944500  |
| H | -2.43833000 | 2.29925600  | -1.44166700 |
| C | -1.74028400 | 4.04991500  | 1.39416200  |
| H | -1.37927900 | 3.17740600  | 3.33390100  |
| H | -2.13927000 | 4.63398800  | -0.64497200 |
| H | -1.61108100 | 5.07002200  | 1.74320700  |
| N | -4.19108300 | -0.04836100 | 0.05054000  |
| C | -5.24361700 | 0.42969000  | -0.08395500 |
| C | -6.54528800 | 0.99019500  | -0.23626600 |
| C | -7.15230000 | 1.64323900  | 0.85387200  |
| C | -7.21076200 | 0.88143200  | -1.47261500 |
| C | -8.42358800 | 2.18547200  | 0.69742800  |
| H | -6.62868700 | 1.71769200  | 1.80089700  |
| C | -8.48191000 | 1.42875200  | -1.60974400 |
| H | -6.73229300 | 0.37445800  | -2.30375400 |

|    |              |             |             |
|----|--------------|-------------|-------------|
| C  | -9.08638000  | 2.07842100  | -0.52906000 |
| H  | -8.89919400  | 2.69003700  | 1.53190000  |
| H  | -9.00257500  | 1.34880900  | -2.55825000 |
| H  | -10.07916000 | 2.50239700  | -0.64309100 |
| Au | 0.44738100   | -0.54425500 | -0.23514900 |
| P  | 2.73691100   | -0.04183700 | -0.20508400 |
| C  | 3.61375300   | -0.92369400 | 1.15063400  |
| C  | 2.97803900   | -1.05320800 | 2.39559000  |
| C  | 4.90261800   | -1.44806800 | 0.97329900  |
| C  | 3.62888000   | -1.68949900 | 3.45137300  |
| H  | 1.97376800   | -0.66292300 | 2.53680200  |
| C  | 5.54766800   | -2.08683500 | 2.03389600  |
| H  | 5.39851600   | -1.36853900 | 0.01129100  |
| C  | 4.91373600   | -2.20747500 | 3.27142900  |
| H  | 3.12996000   | -1.78913800 | 4.41048200  |
| H  | 6.54359000   | -2.49426000 | 1.88921300  |
| H  | 5.41635500   | -2.70974100 | 4.09235500  |
| C  | 3.10956300   | 1.74629200  | 0.01236900  |
| C  | 2.18954800   | 2.70038100  | -0.44795600 |
| C  | 4.30782900   | 2.17036900  | 0.60803600  |
| C  | 2.47202600   | 4.06089300  | -0.32591000 |
| H  | 1.25157600   | 2.37961800  | -0.89222600 |
| C  | 4.58286800   | 3.53278500  | 0.73009500  |
| H  | 5.01963300   | 1.44144900  | 0.98209700  |
| C  | 3.66792700   | 4.47820200  | 0.26193800  |
| H  | 1.75503500   | 4.79355300  | -0.68366000 |
| H  | 5.51034200   | 3.85435600  | 1.19394300  |
| H  | 3.88447700   | 5.53766700  | 0.36048500  |
| C  | 3.55034800   | -0.57398100 | -1.76836000 |
| C  | 4.46222300   | 0.24268500  | -2.45088600 |
| C  | 3.24468400   | -1.85089100 | -2.27082000 |
| C  | 5.06500400   | -0.21553800 | -3.62466100 |
| H  | 4.70177400   | 1.23139000  | -2.07410800 |
| C  | 3.85823600   | -2.30283900 | -3.43820900 |
| H  | 2.53183700   | -2.48696900 | -1.75240400 |
| C  | 4.76656800   | -1.48619200 | -4.11750400 |
| H  | 5.76861900   | 0.42250100  | -4.15070700 |
| H  | 3.62617000   | -3.29315000 | -3.81864500 |
| H  | 5.23895000   | -1.83991500 | -5.02896700 |

**2'**

|   |             |             |            |
|---|-------------|-------------|------------|
| C | -1.64942400 | -0.66029500 | 0.48822000 |
| C | -2.50255600 | 0.44348600  | 0.44569000 |
| N | -2.13101900 | -1.93190400 | 0.66860900 |
| C | -3.41538800 | -2.25559800 | 1.32241500 |
| H | -4.24225800 | -2.30366300 | 0.60644400 |
| H | -3.33279300 | -3.22855500 | 1.80406600 |
| H | -3.62010400 | -1.49523500 | 2.07952000 |

|    |              |             |             |
|----|--------------|-------------|-------------|
| S  | -1.03561300  | -3.32531400 | 0.48675500  |
| O  | 0.23865400   | -3.04553200 | 1.17520300  |
| O  | -1.84987400  | -4.49601000 | 0.85248800  |
| C  | -0.74856500  | -3.35985400 | -1.29602500 |
| H  | -0.38111600  | -2.37885300 | -1.62146400 |
| H  | 0.02419500   | -4.12532200 | -1.45474900 |
| H  | -1.68721100  | -3.63683700 | -1.78669400 |
| C  | -2.05176500  | 1.86285500  | 0.53735300  |
| C  | -1.24779800  | 2.27991600  | 1.61117800  |
| C  | -2.45089900  | 2.81304800  | -0.41844400 |
| C  | -0.82821000  | 3.60769700  | 1.70946600  |
| H  | -0.97409200  | 1.56214100  | 2.37740100  |
| C  | -2.03696800  | 4.14024700  | -0.31368200 |
| H  | -3.07287600  | 2.50797300  | -1.25408900 |
| C  | -1.22086000  | 4.53920800  | 0.74696800  |
| H  | -0.21174800  | 3.91806000  | 2.54787300  |
| H  | -2.34428800  | 4.86061900  | -1.06481300 |
| H  | -0.90161400  | 5.57372800  | 0.82695300  |
| N  | -3.85307900  | 0.31107300  | 0.24616900  |
| C  | -4.99300500  | 0.32849900  | -0.00867200 |
| C  | -6.37349800  | 0.31296900  | -0.32263800 |
| C  | -6.80605900  | -0.21156800 | -1.55981500 |
| C  | -7.30660800  | 0.82571500  | 0.60536500  |
| C  | -8.16416400  | -0.23083300 | -1.85240000 |
| H  | -6.07982200  | -0.59861100 | -2.26795400 |
| C  | -8.65914000  | 0.81498600  | 0.28636900  |
| H  | -6.96232800  | 1.22628500  | 1.55274900  |
| C  | -9.08688200  | 0.28367900  | -0.93496700 |
| H  | -8.50549000  | -0.63916800 | -2.79779100 |
| H  | -9.38193700  | 1.21198900  | 0.99125800  |
| H  | -10.14571800 | 0.27083400  | -1.17384500 |
| Au | 0.38758200   | -0.25420100 | 0.19083500  |
| P  | 2.67848100   | 0.17620600  | -0.20558200 |
| C  | 3.61819700   | 0.44057500  | 1.35763900  |
| C  | 3.04129600   | 1.24793600  | 2.35128800  |
| C  | 4.88288700   | -0.12716000 | 1.57033500  |
| C  | 3.72829400   | 1.48862000  | 3.54074000  |
| H  | 2.06226200   | 1.68596900  | 2.19144900  |
| C  | 5.56148100   | 0.11652700  | 2.76632600  |
| H  | 5.33246600   | -0.75960800 | 0.81351300  |
| C  | 4.98825400   | 0.92254800  | 3.74914100  |
| H  | 3.27688900   | 2.11327300  | 4.30564600  |
| H  | 6.53889600   | -0.32988700 | 2.92889000  |
| H  | 5.51725500   | 1.10408600  | 4.67929200  |
| C  | 2.99290200   | 1.66612900  | -1.24010700 |
| C  | 2.04113100   | 2.04458400  | -2.19679300 |
| C  | 4.17185500   | 2.41331000  | -1.10551300 |
| C  | 2.26924000   | 3.15068700  | -3.01548600 |

|   |             |              |              |
|---|-------------|--------------|--------------|
| H | 1. 11866300 | 1. 47899700  | -2. 29657300 |
| C | 4. 39544300 | 3. 52366200  | -1. 92214800 |
| H | 4. 91118800 | 2. 13855900  | -0. 35733600 |
| C | 3. 44557800 | 3. 89091300  | -2. 88007300 |
| H | 1. 52610000 | 3. 43783400  | -3. 75324300 |
| H | 5. 30831900 | 4. 09835700  | -1. 81082800 |
| H | 3. 62208600 | 4. 75518200  | -3. 51147100 |
| C | 3. 49299800 | -1. 24026400 | -1. 05779600 |
| C | 4. 42147200 | -1. 05193100 | -2. 09266200 |
| C | 3. 18061100 | -2. 54335800 | -0. 63293800 |
| C | 5. 03284100 | -2. 15360600 | -2. 69260600 |
| H | 4. 66756300 | -0. 05066400 | -2. 43038300 |
| C | 3. 80320500 | -3. 63968700 | -1. 23383100 |
| H | 2. 45486800 | -2. 70362600 | 0. 15945900  |
| C | 4. 72739900 | -3. 44594800 | -2. 26346800 |
| H | 5. 74725500 | -2. 00130600 | -3. 49520300 |
| H | 3. 56402600 | -4. 64399500 | -0. 89391800 |
| H | 5. 20616500 | -4. 30274500 | -2. 73005200 |

1"

|    |              |              |              |
|----|--------------|--------------|--------------|
| C  | 2. 87965800  | -0. 74963500 | 0. 58841300  |
| C  | 3. 75132900  | 0. 07203900  | 0. 39615200  |
| N  | 1. 90443000  | -1. 70553800 | 0. 78246700  |
| C  | 2. 03637600  | -2. 35092000 | 2. 13384000  |
| H  | 1. 21120700  | -3. 04803900 | 2. 28276300  |
| H  | 2. 99829600  | -2. 86501900 | 2. 20319000  |
| H  | 1. 98037500  | -1. 56372100 | 2. 88613000  |
| S  | 2. 15733900  | -3. 01223900 | -0. 59852500 |
| O  | 1. 86320100  | -2. 26378600 | -1. 82651300 |
| O  | 3. 45006500  | -3. 64611500 | -0. 31844200 |
| C  | 0. 81883300  | -4. 18948700 | -0. 27925800 |
| H  | -0. 12713700 | -3. 65172400 | -0. 20702400 |
| H  | 0. 81350800  | -4. 84501700 | -1. 15352400 |
| H  | 1. 04498500  | -4. 76288500 | 0. 61878500  |
| C  | 4. 76665900  | 1. 04745500  | 0. 17341400  |
| C  | 4. 54883700  | 2. 10404800  | -0. 73318500 |
| C  | 5. 99692100  | 0. 95817100  | 0. 85455800  |
| C  | 5. 54626700  | 3. 04965000  | -0. 95050500 |
| H  | 3. 60311700  | 2. 16708000  | -1. 26179000 |
| C  | 6. 98490400  | 1. 91280000  | 0. 63319400  |
| H  | 6. 16552000  | 0. 14010400  | 1. 54713400  |
| C  | 6. 76260300  | 2. 95741900  | -0. 26815200 |
| H  | 5. 37710200  | 3. 85937900  | -1. 65344600 |
| H  | 7. 93109300  | 1. 84028200  | 1. 16007000  |
| H  | 7. 53783200  | 3. 69763400  | -0. 44086700 |
| Au | -0. 01246000 | -0. 67050500 | 0. 40787500  |
| P  | -1. 97485900 | 0. 46115000  | -0. 02744600 |
| C  | -2. 80201500 | -0. 23127900 | -1. 51026000 |

|   |             |             |             |
|---|-------------|-------------|-------------|
| C | -2.01641000 | -0.66582000 | -2.59102900 |
| C | -4.20108200 | -0.29920900 | -1.59043200 |
| C | -2.62989500 | -1.15654700 | -3.74270400 |
| H | -0.93166600 | -0.62460100 | -2.53544700 |
| C | -4.80620000 | -0.79557600 | -2.74623500 |
| H | -4.81511600 | 0.02755800  | -0.75751000 |
| C | -4.02360500 | -1.22279100 | -3.82048200 |
| H | -2.01958900 | -1.49058900 | -4.57595100 |
| H | -5.88883400 | -0.84952000 | -2.80429700 |
| H | -4.49838200 | -1.61026700 | -4.71662500 |
| C | -1.63967500 | 2.23510500  | -0.35029500 |
| C | -0.71649200 | 2.91262500  | 0.46322200  |
| C | -2.30884600 | 2.92537500  | -1.37150700 |
| C | -0.47194100 | 4.26917000  | 0.25859200  |
| H | -0.19090200 | 2.38333500  | 1.25366500  |
| C | -2.05517700 | 4.28354200  | -1.57207100 |
| H | -3.01854100 | 2.40923900  | -2.00952800 |
| C | -1.13996500 | 4.95478600  | -0.75979400 |
| H | 0.24229300  | 4.78877400  | 0.88964400  |
| H | -2.57227800 | 4.81410600  | -2.36544000 |
| H | -0.94388200 | 6.01027100  | -0.92131600 |
| C | -3.15967500 | 0.36829600  | 1.36914100  |
| C | -3.93808500 | 1.47777100  | 1.73057100  |
| C | -3.30905200 | -0.84426100 | 2.06158200  |
| C | -4.85791600 | 1.36961100  | 2.77537200  |
| H | -3.82623600 | 2.42069700  | 1.20562700  |
| C | -4.23205800 | -0.94543200 | 3.10055800  |
| H | -2.70584400 | -1.70602800 | 1.78873900  |
| C | -5.00563600 | 0.16199500  | 3.45912600  |
| H | -5.45594700 | 2.23136400  | 3.05470900  |
| H | -4.34411600 | -1.88447000 | 3.63353800  |
| H | -5.71956500 | 0.08334800  | 4.27314500  |

**1-Me**

|    |             |             |             |
|----|-------------|-------------|-------------|
| C  | -3.07772300 | 0.46378600  | -0.33481300 |
| C  | -2.46842900 | -0.66709800 | -0.35668900 |
| N  | -3.60334100 | 1.63195500  | -0.29041200 |
| C  | -3.78195500 | 2.45311700  | -1.50849500 |
| H  | -4.83241900 | 2.74247100  | -1.59715000 |
| H  | -3.16375900 | 3.35273900  | -1.43356500 |
| H  | -3.48419100 | 1.87026700  | -2.37903700 |
| Au | -0.39012300 | -0.28215400 | -0.12692200 |
| P  | 1.93610200  | 0.01755800  | 0.10177100  |
| C  | -3.02343800 | -2.02285600 | -0.51780200 |
| C  | -4.41373700 | -2.22040000 | -0.63028000 |
| C  | -2.17824000 | -3.14384100 | -0.56565600 |
| C  | -4.93834200 | -3.49921700 | -0.78307400 |
| H  | -5.08313500 | -1.36497700 | -0.59652700 |

|   |             |             |             |
|---|-------------|-------------|-------------|
| C | -2.70613600 | -4.42521800 | -0.71991500 |
| H | -1.10392500 | -3.00724900 | -0.48532900 |
| C | -4.08531600 | -4.60663500 | -0.82787200 |
| H | -6.01220900 | -3.63496600 | -0.86741600 |
| H | -2.03914100 | -5.28098600 | -0.75546900 |
| H | -4.49628900 | -5.60461300 | -0.94643600 |
| C | 2.48157100  | 1.68527800  | -0.45375900 |
| C | 3.52196000  | 1.85561200  | -1.37651400 |
| C | 1.82881600  | 2.81210500  | 0.07387100  |
| C | 3.90441200  | 3.14155600  | -1.76576000 |
| H | 4.03192500  | 0.99301200  | -1.79188500 |
| C | 2.22053500  | 4.09190400  | -0.31266800 |
| H | 1.02291400  | 2.68800300  | 0.79277700  |
| C | 3.25719800  | 4.25789200  | -1.23589900 |
| H | 4.70986100  | 3.26707400  | -2.48268200 |
| H | 1.71773400  | 4.95946700  | 0.10412100  |
| H | 3.55816400  | 5.25560700  | -1.53992800 |
| C | 2.50165700  | -0.15415600 | 1.84118400  |
| C | 1.82728600  | -1.04075200 | 2.69502400  |
| C | 3.60997100  | 0.56227300  | 2.31929900  |
| C | 2.26156900  | -1.21344500 | 4.00897800  |
| H | 0.96362600  | -1.59301600 | 2.33525500  |
| C | 4.03805300  | 0.38586600  | 3.63583400  |
| H | 4.13182400  | 1.25916600  | 1.67134200  |
| C | 3.36595800  | -0.50028000 | 4.48006900  |
| H | 1.73470600  | -1.89932300 | 4.66498100  |
| H | 4.89431600  | 0.94383500  | 4.00156700  |
| H | 3.69941700  | -0.63175400 | 5.50497500  |
| C | 2.86861600  | -1.21118400 | -0.89837200 |
| C | 2.35965900  | -1.59063600 | -2.15133300 |
| C | 4.07833900  | -1.75879400 | -0.44619800 |
| C | 3.05776900  | -2.50131000 | -2.94373500 |
| H | 1.42074800  | -1.17459000 | -2.50739400 |
| C | 4.76894100  | -2.67421800 | -1.24217300 |
| H | 4.47729900  | -1.47914800 | 0.52318800  |
| C | 4.26150500  | -3.04533300 | -2.48862900 |
| H | 2.65917200  | -2.79014600 | -3.91131300 |
| H | 5.70241900  | -3.09858600 | -0.88539300 |
| H | 4.80046100  | -3.76014300 | -3.10312500 |
| C | -4.02601400 | 2.25283000  | 0.98488300  |
| H | -3.45393400 | 3.17176100  | 1.14623200  |
| H | -5.09087900 | 2.49634900  | 0.93434800  |
| H | -3.84424100 | 1.55448400  | 1.80078500  |

**4-Me**

|   |            |             |             |
|---|------------|-------------|-------------|
| C | 4.91449700 | -0.29343800 | -0.46997300 |
| N | 3.77405100 | -0.46464400 | -0.34348800 |



|    |             |             |             |
|----|-------------|-------------|-------------|
| C  | 2.37652300  | -0.69522000 | -0.28867900 |
| C  | 1.56706800  | 0.33096900  | 0.07715500  |
| N  | 2.08599900  | -2.01641900 | -0.67999200 |
| C  | 1.59853900  | -2.17675900 | -2.05179800 |
| H  | 2.23009200  | -1.60862200 | -2.74012900 |
| H  | 1.65511700  | -3.23311300 | -2.33161000 |
| H  | 0.55807400  | -1.83607900 | -2.17414000 |
| Au | -0.49442600 | 0.19137000  | -0.00089100 |
| P  | -2.87600700 | 0.17074000  | -0.03558000 |
| C  | 2.13646700  | 1.61307600  | 0.55392300  |
| C  | 3.01853100  | 1.65850500  | 1.65101900  |
| C  | 1.77923100  | 2.82512800  | -0.06656600 |
| C  | 3.53774000  | 2.87388100  | 2.09965100  |
| H  | 3.26877400  | 0.73958400  | 2.17421700  |
| C  | 2.32072800  | 4.03385000  | 0.36642000  |
| H  | 1.08138300  | 2.80937500  | -0.89861600 |
| C  | 3.20008300  | 4.06458000  | 1.45216900  |
| H  | 4.19631300  | 2.89075900  | 2.96345500  |
| H  | 2.04473400  | 4.95618700  | -0.13586900 |
| H  | 3.60344100  | 5.01004300  | 1.80164700  |
| C  | 6.30368200  | -0.05461300 | -0.58020800 |
| C  | 7.15531400  | -1.06543400 | -1.07327800 |
| C  | 6.81219000  | 1.20230200  | -0.18711100 |
| C  | 8.51727800  | -0.80763000 | -1.16950300 |
| H  | 6.74707700  | -2.02539400 | -1.37029000 |
| C  | 8.17816700  | 1.43481900  | -0.29318900 |
| H  | 6.13992500  | 1.96375900  | 0.19411400  |
| C  | 9.02724300  | 0.43634000  | -0.78223200 |
| H  | 9.18319900  | -1.57638700 | -1.54689500 |
| H  | 8.58294200  | 2.39598400  | 0.00562000  |
| H  | 10.09259800 | 0.62827200  | -0.86165100 |
| C  | -3.58867400 | -1.18631400 | -1.05677300 |
| C  | -4.67215800 | -0.97754400 | -1.92164600 |
| C  | -3.03000700 | -2.47008400 | -0.94625100 |
| C  | -5.18830200 | -2.04156300 | -2.66466300 |
| H  | -5.11079000 | 0.00992700  | -2.01975200 |
| C  | -3.55365200 | -3.52973600 | -1.68494700 |
| H  | -2.18942900 | -2.64065400 | -0.27904400 |

|   |             |             |             |
|---|-------------|-------------|-------------|
| C | -4.63208000 | -3.31591200 | -2.54748000 |
| H | -6.02580600 | -1.87158500 | -3.33440400 |
| H | -3.11875100 | -4.52024000 | -1.59088500 |
| H | -5.03567900 | -4.14055200 | -3.12710500 |
| C | -3.59376200 | -0.02950700 | 1.64738200  |
| C | -2.94756700 | 0.58707600  | 2.73107700  |
| C | -4.77034100 | -0.76068500 | 1.86843600  |
| C | -3.47780900 | 0.47996100  | 4.01621900  |
| H | -2.03175000 | 1.14953300  | 2.56976400  |
| C | -5.29317200 | -0.86860500 | 3.15834600  |
| H | -5.27459700 | -1.24900500 | 1.04076400  |
| C | -4.64977600 | -0.24924100 | 4.23126100  |
| H | -2.97295000 | 0.95997500  | 4.84900100  |
| H | -6.20244200 | -1.43865800 | 3.32309700  |
| H | -5.05812400 | -0.33736200 | 5.23346700  |
| C | -3.56807800 | 1.73744100  | -0.71296100 |
| C | -2.94860100 | 2.31491400  | -1.83353900 |
| C | -4.69577200 | 2.35365000  | -0.15250800 |
| C | -3.45760400 | 3.48780600  | -2.38930200 |
| H | -2.07144700 | 1.84559000  | -2.27148300 |
| C | -5.19657300 | 3.53222300  | -0.70915000 |
| H | -5.17944500 | 1.92025300  | 0.71662700  |
| C | -4.58078300 | 4.09893800  | -1.82601500 |
| H | -2.97521500 | 3.92690800  | -3.25734400 |
| H | -6.06790100 | 4.00630600  | -0.26771000 |
| H | -4.97240300 | 5.01605200  | -2.25550700 |
| C | 1.40001500  | -2.84938800 | 0.30742500  |
| H | 1.86850500  | -2.72395900 | 1.28635100  |
| H | 0.32881300  | -2.61264000 | 0.40496900  |
| H | 1.49700400  | -3.89905900 | 0.01221300  |

**TS4-5-Me**

|   |             |             |             |
|---|-------------|-------------|-------------|
| C | -4.54484200 | -0.55523500 | -0.47874800 |
| N | -3.60990200 | -1.23538400 | -0.11759600 |
| C | -2.19918000 | -1.26760600 | -0.18283700 |
| C | -1.43755300 | -0.44040200 | 0.58884500  |
| C | -2.99408700 | 1.41856600  | -1.58657700 |
| N | -4.03938100 | 0.92351200  | -1.38932100 |
| N | -1.67964300 | -2.27149100 | -1.03552700 |

|    |             |             |             |
|----|-------------|-------------|-------------|
| C  | -1.33210100 | -3.52887800 | -0.35761600 |
| H  | -2.22197000 | -4.10735000 | -0.05946300 |
| H  | -0.73225300 | -4.14652400 | -1.03285200 |
| H  | -0.73866100 | -3.31155600 | 0.53145500  |
| Au | 0.62030000  | -0.46760400 | 0.35134100  |
| P  | 2.98878200  | -0.47327800 | 0.11716400  |
| C  | -2.01412600 | 0.40331700  | 1.65923500  |
| C  | -1.55973700 | 1.72555900  | 1.84117700  |
| C  | -2.97235900 | -0.09099400 | 2.56804800  |
| C  | -2.07244700 | 2.53122200  | 2.85531000  |
| H  | -0.79762100 | 2.11626300  | 1.17293200  |
| C  | -3.46841700 | 0.70898000  | 3.59640800  |
| H  | -3.30755700 | -1.11985900 | 2.48242800  |
| C  | -3.02928400 | 2.02636200  | 3.73958200  |
| H  | -1.71340500 | 3.55038800  | 2.96696600  |
| H  | -4.19459900 | 0.29918000  | 4.29253500  |
| H  | -3.41606500 | 2.64806500  | 4.54129900  |
| C  | -1.85562300 | 2.19476200  | -1.93788900 |
| C  | -1.92539700 | 3.59558200  | -1.78859000 |
| C  | -0.69513600 | 1.58045400  | -2.44871700 |
| C  | -0.83198100 | 4.37188800  | -2.15625600 |
| H  | -2.82576900 | 4.05344000  | -1.39363500 |
| C  | 0.38629900  | 2.37477400  | -2.81351100 |
| H  | -0.64778900 | 0.50127400  | -2.53415800 |
| C  | 0.31892200  | 3.76398700  | -2.66755800 |
| H  | -0.87765100 | 5.45032000  | -2.04569200 |
| H  | 1.29020700  | 1.91240400  | -3.19515600 |
| H  | 1.17224800  | 4.37316400  | -2.94770800 |
| C  | -5.98721000 | -0.57050100 | -0.36743000 |
| C  | -6.80218200 | 0.43257500  | -0.91437500 |
| C  | -6.56937100 | -1.65644400 | 0.32020200  |
| C  | -8.18490900 | 0.34939400  | -0.77526500 |
| H  | -6.35130700 | 1.26498900  | -1.43987000 |
| C  | -7.95043000 | -1.72774600 | 0.45098400  |
| H  | -5.93188300 | -2.42753600 | 0.73878000  |
| C  | -8.76023500 | -0.72616600 | -0.09523100 |
| H  | -8.81398300 | 1.12574300  | -1.19827000 |
| H  | -8.39744400 | -2.56371700 | 0.97921600  |
| H  | -9.83907700 | -0.78553600 | 0.01025900  |
| C  | 3.61843200  | -1.88970200 | -0.87938600 |
| C  | 4.94373200  | -2.33894800 | -0.76777800 |
| C  | 2.74838700  | -2.52435400 | -1.77971000 |
| C  | 5.39040700  | -3.40273300 | -1.55148400 |
| H  | 5.62248100  | -1.86851200 | -0.06359700 |
| C  | 3.20245400  | -3.58494700 | -2.56529400 |
| H  | 1.71561800  | -2.19520100 | -1.85697900 |
| C  | 4.52220800  | -4.02517100 | -2.45163300 |
| H  | 6.41540100  | -3.74781000 | -1.45579000 |

|   |              |              |              |
|---|--------------|--------------|--------------|
| H | 2. 52376100  | -4. 07176500 | -3. 25929000 |
| H | 4. 87264000  | -4. 85509800 | -3. 05779200 |
| C | 3. 59523200  | 1. 05488100  | -0. 72529600 |
| C | 3. 33860300  | 2. 29402200  | -0. 11443000 |
| C | 4. 25210700  | 1. 02145800  | -1. 96264900 |
| C | 3. 74882200  | 3. 47756600  | -0. 72563600 |
| H | 2. 82732000  | 2. 33217400  | 0. 84383500  |
| C | 4. 65085700  | 2. 21206200  | -2. 57758100 |
| H | 4. 46074800  | 0. 07214400  | -2. 44465700 |
| C | 4. 40451000  | 3. 43915300  | -1. 96027700 |
| H | 3. 56054700  | 4. 42898300  | -0. 23691300 |
| H | 5. 16532800  | 2. 17563200  | -3. 53327100 |
| H | 4. 72856100  | 4. 36132400  | -2. 43365200 |
| C | 3. 88444300  | -0. 53059900 | 1. 72447100  |
| C | 3. 29464300  | -1. 22570900 | 2. 79196200  |
| C | 5. 14109900  | 0. 06970400  | 1. 90159300  |
| C | 3. 95791700  | -1. 32813900 | 4. 01460500  |
| H | 2. 31615000  | -1. 68146000 | 2. 66771100  |
| C | 5. 79848300  | -0. 03348300 | 3. 12831200  |
| H | 5. 60206700  | 0. 62421000  | 1. 09022000  |
| C | 5. 20951400  | -0. 73247200 | 4. 18392200  |
| H | 3. 49377300  | -1. 86603400 | 4. 83557600  |
| H | 6. 76914300  | 0. 43526600  | 3. 25910400  |
| H | 5. 72234500  | -0. 80779800 | 5. 13800000  |
| C | -2. 41045900 | -2. 49755600 | -2. 28208900 |
| H | -1. 80211600 | -3. 12979200 | -2. 93479100 |
| H | -3. 38294700 | -2. 99641700 | -2. 14029200 |
| H | -2. 58137000 | -1. 54825700 | -2. 79721500 |

**P1**

|   |             |              |              |
|---|-------------|--------------|--------------|
| C | 2. 75569000 | -0. 15883600 | -0. 70505800 |
| C | 2. 42189700 | 1. 15592400  | -0. 35067800 |
| C | 2. 46864400 | 1. 46706100  | 1. 03505900  |
| N | 2. 82894800 | 0. 55678900  | 1. 95646300  |
| N | 2. 73904200 | -0. 61921300 | -2. 06324800 |
| C | 3. 65509200 | -0. 02844500 | -3. 05293700 |
| H | 4. 60822500 | 0. 16302100  | -2. 55404700 |
| H | 3. 82772800 | -0. 74251500 | -3. 86143600 |
| H | 3. 27870900 | 0. 90291900  | -3. 48201300 |
| S | 1. 29537300 | -1. 31388400 | -2. 66907800 |
| O | 0. 25551400 | -1. 14064100 | -1. 63460500 |
| O | 1. 11965200 | -0. 82404500 | -4. 05044000 |
| C | 1. 65606300 | -3. 08183700 | -2. 78062100 |
| H | 1. 81864900 | -3. 47684700 | -1. 77902600 |
| H | 0. 78075200 | -3. 53809600 | -3. 24709500 |
| H | 2. 53720600 | -3. 22422300 | -3. 40636800 |
| C | 2. 08877200 | 2. 18988300  | -1. 37586800 |
| C | 0. 92596100 | 2. 10302600  | -2. 15573000 |
| C | 2. 95973400 | 3. 27490000  | -1. 56546600 |

|   |             |             |             |
|---|-------------|-------------|-------------|
| C | 0.64718900  | 3.08318500  | -3.11011500 |
| H | 0.24241400  | 1.27444800  | -2.00824100 |
| C | 2.67974300  | 4.24774800  | -2.52368500 |
| H | 3.85566700  | 3.35504500  | -0.95687100 |
| C | 1.52177000  | 4.15421700  | -3.29910700 |
| H | -0.25585000 | 3.00349700  | -3.70788800 |
| H | 3.36422700  | 5.07969000  | -2.66194900 |
| H | 1.30223100  | 4.91295500  | -4.04467200 |
| C | 2.12619800  | 2.79686500  | 1.61715100  |
| C | 2.91614200  | 3.29243100  | 2.66798600  |
| C | 1.00880100  | 3.53956300  | 1.20475100  |
| C | 2.61333500  | 4.51136300  | 3.27085300  |
| H | 3.76215800  | 2.70538600  | 3.00843800  |
| C | 0.70066300  | 4.75301800  | 1.81865500  |
| H | 0.37014700  | 3.16422400  | 0.41373300  |
| C | 1.50470800  | 5.24717000  | 2.84717000  |
| H | 3.24053300  | 4.88416000  | 4.07561500  |
| H | -0.17306800 | 5.31039400  | 1.49353700  |
| H | 1.26544700  | 6.19590300  | 3.31916500  |
| C | 3.16216700  | -1.04400300 | 0.31914900  |
| N | 3.18016700  | -0.66800100 | 1.60770600  |
| C | 3.60698800  | -2.44716000 | 0.09077100  |
| C | 3.08249100  | -3.46582000 | 0.90151500  |
| C | 4.58596100  | -2.77521500 | -0.86013700 |
| C | 3.50280800  | -4.78637200 | 0.74162800  |
| H | 2.34817500  | -3.20807800 | 1.65719600  |
| C | 5.01571300  | -4.09363500 | -1.00849200 |
| H | 5.02767300  | -1.99557100 | -1.47125100 |
| C | 4.46897500  | -5.10477700 | -0.21495900 |
| H | 3.08049300  | -5.56501600 | 1.37016000  |
| H | 5.78317900  | -4.33035800 | -1.74003700 |
| H | 4.80055800  | -6.13204500 | -0.33559800 |

**P2**

|   |            |             |             |
|---|------------|-------------|-------------|
| C | 2.83414400 | -0.31758600 | -0.81403300 |
| C | 2.58678800 | 1.01998300  | -0.42030400 |
| N | 2.76871600 | -0.74214800 | -2.17843500 |
| C | 3.73926600 | -0.20676500 | -3.14261300 |
| H | 4.73482000 | -0.61997900 | -2.94695200 |
| H | 3.42668700 | -0.48147600 | -4.14988400 |
| H | 3.78683900 | 0.88469500  | -3.09046900 |
| S | 1.31334100 | -1.41703900 | -2.77196800 |
| O | 0.29234200 | -1.21676300 | -1.72422800 |
| O | 1.12085100 | -0.93204100 | -4.15419600 |
| C | 1.62168300 | -3.19535600 | -2.89577500 |
| H | 1.77444000 | -3.60517000 | -1.89891100 |
| H | 0.73147700 | -3.62063000 | -3.36328000 |
| H | 2.49582500 | -3.35823700 | -3.52637500 |

|   |              |              |              |
|---|--------------|--------------|--------------|
| C | 2. 22314200  | 2. 12131100  | -1. 35940500 |
| C | 1. 12877100  | 2. 03500200  | -2. 23216600 |
| C | 2. 97388400  | 3. 30793800  | -1. 31694400 |
| C | 0. 81074900  | 3. 11050600  | -3. 06291100 |
| H | 0. 50505800  | 1. 14967800  | -2. 23371000 |
| C | 2. 66039700  | 4. 37316600  | -2. 15834000 |
| H | 3. 80007500  | 3. 38464200  | -0. 61721500 |
| C | 1. 57825900  | 4. 27546100  | -3. 03678500 |
| H | -0. 04394300 | 3. 03436500  | -3. 72844100 |
| H | 3. 25581300  | 5. 28108800  | -2. 12382900 |
| H | 1. 33003900  | 5. 10701400  | -3. 69024800 |
| C | 3. 20052600  | -1. 21607200 | 0. 21100700  |
| N | 3. 23953700  | -0. 83478300 | 1. 49382500  |
| C | 3. 55563300  | -2. 64551700 | -0. 02772000 |
| C | 2. 93899000  | -3. 63800400 | 0. 74913700  |
| C | 4. 53647800  | -3. 02186500 | -0. 95644400 |
| C | 3. 27013300  | -4. 98157900 | 0. 57352600  |
| H | 2. 20006900  | -3. 34377400 | 1. 48718800  |
| C | 4. 88111000  | -4. 36410400 | -1. 11690000 |
| H | 5. 05030300  | -2. 26241100 | -1. 53582300 |
| C | 4. 24194800  | -5. 34857400 | -0. 36034500 |
| H | 2. 77551600  | -5. 74078600 | 1. 17242900  |
| H | 5. 65311800  | -4. 64008400 | -1. 82953400 |
| H | 4. 50604200  | -6. 39398500 | -0. 49101900 |
| N | 2. 71861700  | 1. 39424400  | 0. 85907900  |
| C | 3. 00828500  | 0. 45617600  | 1. 77238700  |
| C | 3. 08568100  | 0. 87971100  | 3. 19260900  |
| C | 2. 79563400  | 2. 20496300  | 3. 55466100  |
| C | 3. 44993300  | -0. 03951400 | 4. 18953300  |
| C | 2. 86909300  | 2. 60071300  | 4. 88821500  |
| H | 2. 51296800  | 2. 90723600  | 2. 77880200  |
| C | 3. 52250400  | 0. 36101300  | 5. 52165300  |
| H | 3. 67407900  | -1. 06023300 | 3. 90141400  |
| C | 3. 23273500  | 1. 68130500  | 5. 87546500  |
| H | 2. 64073200  | 3. 62771900  | 5. 15869600  |
| H | 3. 80649800  | -0. 35712000 | 6. 28568600  |
| H | 3. 28942600  | 1. 99185900  | 6. 91506600  |

**P3**

|   |             |              |              |
|---|-------------|--------------|--------------|
| C | 3. 15797300 | -0. 95867500 | 1. 04321700  |
| N | 2. 89361300 | -1. 18703200 | -0. 25069200 |
| C | 2. 57395900 | -0. 18103700 | -1. 06021000 |
| C | 2. 50382200 | 1. 14769600  | -0. 57153600 |
| N | 2. 35893000 | -0. 51291700 | -2. 41703700 |
| C | 3. 02511200 | 0. 19929400  | -3. 51781000 |
| H | 3. 83871000 | 0. 79423600  | -3. 09959200 |
| H | 3. 44590900 | -0. 51878100 | -4. 22578900 |
| H | 2. 34104400 | 0. 85913100  | -4. 05514400 |

|   |              |              |              |
|---|--------------|--------------|--------------|
| S | 1. 43721800  | -1. 90300700 | -2. 80724200 |
| O | 0. 39822100  | -2. 04927500 | -1. 77455300 |
| O | 1. 10793600  | -1. 75145600 | -4. 23717900 |
| C | 2. 59114200  | -3. 28671300 | -2. 65658300 |
| H | 2. 95586700  | -3. 30460800 | -1. 63065000 |
| H | 2. 03177100  | -4. 19102100 | -2. 90475900 |
| H | 3. 40434500  | -3. 14025300 | -3. 36902600 |
| C | 2. 03675600  | 2. 32300500  | -1. 35369400 |
| C | 0. 93607100  | 2. 23421400  | -2. 22220400 |
| C | 2. 64927700  | 3. 57132400  | -1. 16025500 |
| C | 0. 47306500  | 3. 36655900  | -2. 89192500 |
| H | 0. 43233000  | 1. 28238800  | -2. 35570100 |
| C | 2. 19266100  | 4. 69766100  | -1. 84115000 |
| H | 3. 47867500  | 3. 64624600  | -0. 46496500 |
| C | 1. 10386700  | 4. 59891900  | -2. 71088600 |
| H | -0. 38615800 | 3. 28479300  | -3. 55122000 |
| H | 2. 68322400  | 5. 65489400  | -1. 68913400 |
| H | 0. 74522400  | 5. 47800400  | -3. 23855900 |
| C | 3. 48720300  | -2. 17621700 | 1. 83500300  |
| C | 4. 59138300  | -2. 23156200 | 2. 69926100  |
| C | 2. 70424200  | -3. 32857500 | 1. 65576900  |
| C | 4. 89858000  | -3. 41147100 | 3. 37550900  |
| H | 5. 21496200  | -1. 35422500 | 2. 83455400  |
| C | 3. 00639400  | -4. 50291400 | 2. 34369800  |
| H | 1. 85744100  | -3. 28611600 | 0. 97730100  |
| C | 4. 10491100  | -4. 54798500 | 3. 20500200  |
| H | 5. 76165300  | -3. 44361000 | 4. 03419700  |
| H | 2. 38480900  | -5. 38309900 | 2. 20617800  |
| H | 4. 34329800  | -5. 46401900 | 3. 73792300  |
| C | 3. 14302800  | 0. 37246500  | 1. 53270500  |
| C | 3. 38732000  | 0. 76967500  | 2. 94836700  |
| C | 2. 79205800  | 0. 08797300  | 4. 02150400  |
| C | 4. 16911100  | 1. 90348400  | 3. 21847700  |
| C | 2. 98833700  | 0. 52259200  | 5. 33160500  |
| H | 2. 16335200  | -0. 77494800 | 3. 82985700  |
| C | 4. 37450100  | 2. 32937700  | 4. 52962800  |
| H | 4. 60789000  | 2. 44864300  | 2. 38916900  |
| C | 3. 78528500  | 1. 63943900  | 5. 59114500  |
| H | 2. 51231800  | -0. 00958900 | 6. 15013500  |
| H | 4. 99012900  | 3. 20343700  | 4. 72225500  |
| H | 3. 94014900  | 1. 97371000  | 6. 61300900  |
| N | 2. 84105300  | 1. 38130700  | 0. 70268900  |
